# Supplementary material for: Genomic Transition to Pathogenicity in Chytrid Fungi
Source: PubMed Central journal article supplement (PMC3207900; doi:10.1371/journal.ppat.1002338), 2011-11-03
Supplement: ppat.1002338.s001.pdf [file ppat.1002338.s001.pdf]

Figure S1. Alignments of M36, S41, and ASP domain protein sequences for Allomyces macrogynus (AMAG), Batrachochytrium dendrobatidis (BATEDERAFT), Homolaphyctis polyrhiza (Hp) and Spizellomyces punctatus (SPPG).

Following are the aligned domain sequences for the three families we targeted. There are two columns separated by tabs. The first column has gene names and the second column contains the sequences.

```
#####
# M36
#####
>AMAG_00149T0 -----FASDPTEGDMALVGDPEdTAV-ASPQGWG-TDG-----LTVGNVVARQSPKAAALA-----
GHAPLVAKGASTAFSAFPALDFPADLRGRPTDHLATSLTNAFYVNLMDLLYRFGTETAGNFQTSNLRGGLLEDAIVHVDHPSQRNANFATPPDGVPPTLTAFLFMSGTTDPVVDSSLMHVEVTHGL
VSRLTGGPANPNCLSTPESRAMNEGADAAFAAFKARATY--ADA-T---IGSFNSGKPN-GLRRFPYSTSTTNPLTYKDATP--NG-
EPHAYGEVWAQILWETLWAGAAATHGFQANWRLTPGFR-----DGNVLTATALGGNVQVQDQVVDGKMLQAC-----NPTMRQARDAILLAQINFDGQNRCDLWRAFAKRLGVNA-
>AMAG_07740T0 AKYSVLPVGTENPNKGPVAVVDSSTAVKTNASPOGWH--STGTTSS---YQDTRGNIIQAQNPNTATAS-----KNVRP--SGGSALDFS-----AIKPDF-
TKAATSYTAAATVQLFYMLNSAHLDSYQYGFDEVSNGFQVNNFGKGGKNDAVIANAQDRSGTNNANFATPPDGQPTTRQYIFQTPTTRDGVYDLTIPFHEFMHGITNRLTGGPSNDCLDYGESGGMGEWGDV
GLVANVLKANS-VRT-GAFPMGAYVLAQAA-GIRTYPPSSDTPVCPNLSYFLGKTYD-EVHRSGEIWATALLLEVYVNLVLEKLYGDIPT--PSTT-----
KGNLTLFLRLVFDGKLIQPC-----NPSFVEARDIAIQADINLTGGANKCAIWKGFAGKRLGTGAK
>AMAG_07748T0 ASYEVYPIGVNDPDDGDRVRVRRPELVR--ASPDGWH--SD-----RTTIGNNVAIQENLSGKADALLKEGSLAAYRP--RSGHKLHFH-----YDIDF-
AKNPKSYLDASITQIFYMLNMDLHDLFYAGFTENAGNFQADNFRGGVAGDPVAFVAFQDQSGYNNANFATPPDGKNGKMRMYVWNTVVPNRDGDLENGVIEHFHGVSNRLTGGPHNSGLCLAWGESGGMGEWGDV
ATIFRHRSDARRRDYGGPWHMKGKANGGTT-GIRKYPYSADMVNPSTYSFLNHQGYW-GVHAKGEVWASILLLEVYVNLINLWGTGDKWS-AAVD-----
KGNLTLFLRLVFDGKLIQPC-----RPTFLDARSAILQAEAVLTGGHACAIWRGFAGKRLGVDAQ
>AMAG_09753T0 ASYEVYPLGVNDPDDGDRVRVRRPELAR--ASPDGWH--SD-----RTTIGNNVAIQENLSGKADVLMKEGELSSAYRP--RSGHKLHFH-----YDIDF-
AKNPKSYLDASITQIFYMLNMDLHDLFYAGFTENAGNFQADNFRGGVAGDPVAFVAFQDQSGYNNANFATPPDGKNGKMRMYVWNTVVPNRDGDLENGVIEHFHGVSNRLTGGPHNSGLCLAWGESGGMGEWGDV
ATIFRHRSDARRRDYGGPWHMKGKANGGTT-GIRKYPYSADMVNPSTYSFLNHQGYW-GVHAKGEVWASILLLEVYVNLIDELGWTSDWS-AAVD-----
KGNLTLFLRLVFDGKLIQPC-----RPTFLDARSAILQAEAVLTGGHACAIWRGFAGKRLGVDAQ
>AMAG_09761T0 AKYSVLPVGTENPNKGSIAVVDSSAVKTNASPOGWH--STGTTSS---YDTRGNIIQAQNPNTATAS-----KNVRP--SGGSALDFS-----GIKPNF-
AVNAEQYTPAATVQLFYMLNMDLHDLFYAGFTENAGNFQADNFRGGVAGDPVAFVAFQDQSGYNNANFATPPDGKNGKMRMYVWNTVVPNRDGDLENGVIEHFHGVSNRLTGGPHNSGLCLAWGESGGMGEWGDV
TNNANFATPPDGQPTTRQYIFQTPTTRDGVYDLTIPFHEFMHGITNRLTGGPSNTDCLDYGESGGMGEWGDVGLVANVLKANS-VRT-AAFPMGAYVLAQAA-GIRTYPPSSDTPVCPNLSYFLGKTYD-
EVHRAGEIWAASILLLEVYVNLVLEKLYGDIPT--PSTT-----KGNLTLFLRLVFDGKLIQPC-----NPSFVEARDIAIQADINLTGGANKCAIWKGFAGKRLGTGAK
>AMAG_10695T0 -----ASDPTTEGDMALVGDPEdTAV-ASPQARVFRFLPIASLPAISYIAHGYSPTHEAALA-----
GHAPLVAKGASTAFSAFPALDFPADLRGRPTDHLATSLTNAFYVNLMDLLYRFGTETAGNFQASNLGRGGLLEDAIVHVDHPSQRNANFATPPDGVAPTLTAFLFMSGTVTPVVDSSLMHVEVTHGL
VSRLTGGPANPNCLSTPESRAMNEGADAAFAAFKARATY-----ADATIGAFNSGKPN-GLRRFAYSTSTTNPLTYKDAPNG---
EPHAYGEVWAQILWETLWAGVASHGFQANWRLTPGFR-----DGTNL TANALGGNVQVQDQVVDGKMLQAC-----NPTMRQARDAILLAQINFDGQNGCDLWRAFAKRLGVNA-
>AMAG_11091T0 AKYSVLPVGTENPDGPIITVVDSSAVKSNASPOGWH--STGSQS---YDTRGNIIQAQNPNTATAS-----KNIRP--DGGALDFT-----KYKPDF-
TKAAETYNAAATQIFYMLNMDLHDLFYAGFTENAGNFQADNFRGGVAGDPVAFVAFQDQSGYNNANFATPPDGQAPVTHQYIFQTPTTRDGVYDLTIPFHEFMHGITNRLTGGPSNTDCLDYGESGGMGEWGDIF
GLWANVLKADT-SRT-TKLPMAAYVMQAN-GIRTYPPSSDLKVPCLNLSYLAQSYQY--EVHMAGEIWAASILLLEVYVNLVVKYGYGDIWT--ADAS-----
KGNLTLFLRLVFDGKLIQPC-----NPTFINARDAILQADKNTLGGKQCEIWKGFAGKRLGTGAK
>AMAG_11092T0 -RYTVLPIGTVSPKTPGPIIDIDGSSVVKSNASPKGWH--ATNAES---WYTRGENTFVLPAL-----NNVVPVGSGLDGLDFT-----AWGKPDF-
SKNADQYTMQAQIQLFYEMNYAHLDSYQYGFDEVSNGFQVNNFGKGGKNDAVIANAQDRSGTNNANFATPPDGQPTTRQYIFLGNTPSDGVYVPLPLHEFMHGITNRLTGGPSNDCLDYGESGGMGEWSDV
GLVNVFKADS-DPN-ASYGVGVYVANNPN-GIRTYPPSNMNSVNLKYSLSKT--MT-EPHAYGVVWAVLIEYVNLVVKYGYGDLMA--ADFS-----
KGNLTLFLRLVFDGKLIQPC-----NPHILHARNALQADVNMTGGTYSCEIFLFPAGKRGWASA
>AMAG_11093T0 -----LTRFDAPAAR-----ALNNAIPNAPSSLSTPTQ-----VDKYGDIWA--
ADLS-----KGNLTLFLRLVFDGKLIQPC-----SPSLVDARDAIQAQSNLGGKQCEIWKGFAGKRLGNSAQ
>AMAG_11126T0 -RYAVIPVGEQSPDMGLVIVDSASVILNANSPNGWH--DSSVVK---SKTTEGNNVTAQNPNTDGT-----KNGFP--DGGANLDF-----
KYAPIFASPNNDYAGSAVQMFLLMNVADHLCYQYGFDEASGNFQVNNFGKGGKNDAVIANAQDRSGTNNANFATPPDGQPTTRQYIFLGNTPSDGVYVPLPLHEFMHGITNRLTGGPSNDCLDYGESGGMGEWSDV
EGWSDMFLAVNVLKQVTRN-TAAPFAPYVAGTGS-GLRTPYTSQVNPNSVYSLGRADYQ-TVHAKGEVWASMLLEVYVNLVVKYGYGDIWT--ADLA-----
HGNTLWLQIMDGLKIQNC-----NPSAVTARDAIITADLLTGAANNCLIWSGFAKRLGTAA-
>AMAG_11128T0 -RYAVIPVGEQSPDKGLVIVDSAAVLDNAPLNGWH--ATSVT---YTTSGKNNVSKPNTNDA-----KNVLP--DGSADLDF-----
KYAPVFATADPNNAAGSAVQLFDLMMNVADHLCYQYGFDEASGNFQVNNFGKGGKNDAVIANAQDRSGTNNANFATPPDGQPTTRQYIFLGNTPSDGVYVPLPLHEFMHGITNRLTGGPSNDCLDYGESGGMGEWSDV
AYLFDYTPNRDSVFDLAIPIHFFHFVGSVRLTGGPANSDCLTPEFAASLAEGWSDMFLAVNVLKQVTRN-TAAPFAPYVAGTGS-GLRTPYTSQVNPNSVYSLGRADYQ-
TVHAKGEVWASMLLEVYVNLVVKYGYGDIWT--ADLA-----HGNTLWLQIMDGLKIQNC-----NPSAVTARDAIITADLLTGAANNCLIWSGFAKRLGTAA-
>AMAG_11133T0 ASYVLPVGTENPNKGSIQVVDSSAVKSNASPOGWH--STGTTSS---YQDTRGNIIQAQNPNTATAS-----KNVRP--SGGSALDFT-----AYKPDF-
SKGADQYTPAATVQLFYMLNMDLHDLFYAGFTENAGNFQADNFRGGVAGDPVAFVAFQDQSGYNNANFATPPDGQPTTRQYIFLGNTPSDGVYVPLPLHEFMHGITNRLTGGPSNDCLDYGESGGMGEWGDV
GLWANVLKADT-KRG-TSLPMGAYVLAQAA-GIRTYPPSSDLKVPCLNLSYLAQSYQY--EVHMAGEIWAASILLLEVYVNLVVKYGYGDIWT--ADLT-----
KGNLTLFLRLVFDGKLIQPC-----SPTFINARDAILQADVNLTGGANKCAIWKGFAGKRLGSKA-
>AMAG_11353T0 AKYSVLPVGTENPNKGPITVVDSSAVKTNASPOGWH--STGTTSS---YDTRGNIIQAQNPNTATV-----KNVRP--SGGSALDFT-----AIKPDF-
TKAATSYTAAATVQLFYMLNSAHDPC-----
TVNNGKGGKNDAVIANSDKSGTDNANFATPPDGQPTTRQYIFLGNTPSDGVYDLTIPFHEFMHGITNRLTGGPSNDCLDDESGGMGEWGDVGLVANVLKSSS-SRS-GSPMGAYVLAQAA-
GIRTYPPSSDLKVPCLNLSYLAQSYQY--EVHMAGEIWAASILLLEVYVNLVDAIYGYGDIWA--ASTS-----KGNLTLFLRLVFDGKLIQPC-----
NPSLVDARNAILQADVNLTGGANKCAIWKGFAGKRLGYSAK
>AMAG_14366T0 -RYPVILVGEQSPVKGPIVIVDSAAVLTNANSPKWH--DDT-AH---HTTEGNNVHARPNTRDIN-----KNVAP--DGGANLDF-----
QYSPVFATADPNNAAGSAVQLFDLMMNVADHLFYAGFTENAGNFQADNFRGGVAGDPVAFVAFQDQSGYNNANFATPPDGQPTTRQYIFLGNTPSDGVYVPLPLHEFMHGITNRLTGGPSNDCLDYGESGGMGEWSDV
EGWSDMFLMNVNLDKESVTRN-MAAPFAPYVAGTGS-GLRTPYTSQVNPNSVYSLGRADYQ-TVHAKGEVWASMLLEVYVNLVVKYGYGDIWT--ANLT-----
YGNLWLQIMDGLKIQNC-----NPTFINARDAILADLLTGAANNCLIWSGFAKRLGTAA-
>AMAG_14954T0 -RYPVIVPGEQSPDQGPVIVDSAAVLTNANSPKWH--DDTAKK---YTTTQGNVKSRLNMDDA-----TDVPT--DGGANLDF-----
KFAPVIATANPNNTAGSAVELFYMLNIAHK-----SPPSATRPAQ-TFRWT-
VMAKEGDFGLVIPHRELFRLRLEPAHGRARQPLGNAGGRGHGRGLVDMFALAVNVLKQVTRN-TATPFAPYVAGTGS-GLRTPDHTSDMQMNPVSYSLGTGEYQY-
QVHKTGEVWASMLWVYVNLVDMHGGPIEM--ANLA-----DGNLWLQIMDGLKIQNC-----NPNFVMDRDAITSAFVLTGGVDCYIWRGFAGKRLGTAA-
>AMAG_15202T0 AKYSVLPVGTENPNKGPITVVDSSAVKSNASPOGWH--STGSAS---YDTHGNKIIQAQNPNTATAS-----KNVRP--SGSSALDFT-----AIKPDF-
TKAVTSYTPAATVQLFYMLNSAHLDSYQYGFDEVSNGFQVNNFGKGGKNDAVIANAQDRSGTNNANFATPPDGQPTTRQYIFLGNTPSDGVYDLTIPFHEFMHGITNRLTGGPSNDCLDYGESGGMGEWSDV
-----DLSVCPNTYSLSKSDYQ-----
EVHQIWEIWAASMLLVYVYL-----LQLC-----NPSLVNAHNAIQADVNLTGGANKCAIWKGFAGKRLGYGAK
>AMAG_16399T0 -----ANTKTAS-----KNIRP--DGGALDFT-----KYKPDF-
TKAAETYNAAATQIFYMLNMDLHDLFYAGFTENAGNFQADNFRGGVAGDPVAFVAFQDQSGYNNANFATPPDGQPTTRQYIFLGNTPSDGVYDLTIPFHEFMHGITNRLTGGPSNTDCLDYGESGGMGEWGDIF
GLWANVLKADT-KRE-TKLPMAAYVMQAN-GIRTYPPSSDLKVPCLNLSYLAQSYQY--EVHMAGEIWAASILLLEVYVNLVVKYGYGDIWT--ADAS-----
KGNLTLFLRLVFDGKLIQPC-----NPTFINARDAILQADKNTLGGKQCEIWKGFAGKRLGTGAK
>AMAG_16400T0 -RYTVLPMGTPNPQAGSFVDVDAGSVIKSNASPKGWH--ATNSES---WYTRGENTFVLPAL-----NNVVPVGSGLDGLDFT-----AWGRPD-
SKNADQYTMQAQIQLFYEMNYAHLDSYQYGFDEVSNGFQVNNFGKGGKNDAVIANAQDRSGTNNANFATPPDGQPTTRQYIFLGNTPSDGVYVPLPLHEFMHGITNRLTGGPSNDCLDYGESGGMGEWSDV
GLILSVFNAGS-DPN-GSYAVGDYVGNRK-GIRKLYSNMNSINPLKYSMSKT--MT-NVHDAGEVWAVLIEYVNLVVKYGYGDIWT--ADLS-----
KGNLTLFLRLVFDGKLIQPC-----NPNPLDGRNALQADISMTGGTYSCEIFGPFAGKRGWASA
>AMAG_16401T0 AKYSVLPVGTENPNKGPISLVDSSAVKSNASPKGWH--STGTTSS---YQDTRGNIIQAQNPNTATAS-----KNVRP--SGGSALDFT-----AYKPDF-
TKAAETYNAAATVQLFYMLNMDLHDLFYAGFTENAGNFQADNFRGGVAGDPVAFVAFQDQSGYNNANFATPPDGQPTTRQYIFLGNTPSDGVYDLTIPFHEFMHGITNRLTGGPSNDCLDYGESGGMGEWGDV
GLWANVLKSSS-KRG-TSLPMGAYVLAQAA-GIRTYPPSSDLKVPCLNLSYLAQSYQY--EVHMAGEIWAASILLLEVYVNLVVKYGYGDIWT--ADLS-----
KGNLTLFLRLVFDGKLIQPC-----SPTLVDARDAIQAQSNLGGKQCEIWKGFAGKRLGNSAQ
>AMAG_16405T0 -----
RVAGGVFDLIPHHEYFHGVSRLTGGPANPNCLSTREAAGLSEGWSDMFLAVDVLNPTVTRN-TATPFAPYVAGNPA-GLRTPYTSQVNPNSVYSLFALDAYQ-
EVHAKGEVWASMLLEVYVNLVDMYQ-----C-----
>AMAG_16408T0 -RYPVIVPGEQSPDKGPIVIVDSAAVMTNANSPNGWH--DNTVRQ---FTTQGNADVRPNTNDA-----QNVPP--DGGADLDF-----
KFAPVFATADPNDAAGSA-----
AAGNQDNYKGGGFGSDHGAQVQVADGVNTEFFITPPDQGRPLVGAFLTYTTPKRDVFDLIPHHEYFHGVSRLTGGPANPNCLSTREAAGLSEGWSDMFLAVDVLNPTVTRN-TATPFAPYVAGNPA-
GLRTPYTSQVNPNSVYSLFALDAYQ-EVHAKGEVWASMLLEVYVNLVDMYQCGPIEK--ADLT-----NGNALWLQIMDGLKIQNC-----
NPDVFTARNILADVLTGGANSLIWRGFAGKRLGSA-
>AMAG_16410T0 --YVPIVREQSPDRGPIVNVNNSKEVINASPOGWH--KAGPTTS---FTDTRGNVDARPNTADLA-----KNVRP--DGGPTRDRF-----PFAPDF-
```

TKNADQYTPGATVQLFYALNKAHDVSYKYGFDEASGNFQIDNYGKGLSGDPIEAQLDQSGVNNANFATPPDQSQPTTRQYIFTYNTNPRDGVYDLVDPHFHEFFHGVSNRLTGGPANTDCLPDGEGGMEGWSDF  
SMIAVLDKPTVTRA--TPVPVGTALGDDA--GVRKYPYSTDLAVNPSVYFSLQAEYQ--EVHRIGEVWASMLFEIYWNLDVQYGCAPLEK--HNVR-----  
SGNALMLQLIMDGLKQPC-----IPSFIDARTAILQADENLTGGANQCLIWKGFAKRGLGATA--  
>AMAG\_16411T0 --YVPVPGVASPDAGPIVNVNENDVALTYASPOGWH--KAGMLA---FTDTRGNNDKIPLTSDPA-----KNGRP-----DFR-----PFAPDF--  
TKIAGQYTAGATVQLNYVNLNSAHPAYQHGFDEVSNGFIENFNGGFGDDAMKELVQHREGVINAFFSTPPDG-----  
-----  
>AMAG\_16416T0 --YVPVPGVQSQPDNGPIVVVSDAAVLANASPNGW--DD-----TTTRGNVNTQNPNTDRN-----KNVPP--DGGADLDF-----  
RYAPVFATANPNDAAGAAVQLFYLMNIAHDLTYQYGFNEISGNFQTNNGKGLDGDAITARAQDSMGVNAFYFMTPPDQSKPTATMQLFLLTTPNRDSDFLVPHHEFFHGVSNRLTGGPANPNCLSEFEAAGM  
EGWSDMFALAVNLDKQSIIRD--TAMPFAPYVAGIQ--GLRTPYPTSDMAMPNSTYFSLALDAYQ--EVHKAGEVWASMLWEVYWNLDVQYGCPIEQ--ADLA-----  
HGNALWLQLIMDGLKQPC-----NPNVARTARNAILTADLVLTGGANYCLIWNGFAKRGLGAAA--  
>AMAG\_16418T0 -----SGNFQNSFGKGRLLGGDQAGSMQDYQESNDAQFSTPVEGQOQPTQFCVFMLTNPMRDSPFDMVIFPHEFW-----  
WSDIFALIAIHLDDPAITRN--TPVLVAMHMPGNAG--GICKYPTSTDLAINPSTYAFSLQAEYQ--EVHRIGEVWASMLFEIYWNLDVQYGCAPREK--HNVR-----  
SGNALMLQLIMDGLKQPC-----RPTFIDARTAILQADENLTGGANQCLII--FAKHGLGFTA--  
>AMAG\_16424T0 --YVPVPGVASPDAGPIVNVNENDVALTYASPOGWH--RAGDLT---FTDTRGNNDVAINPTADSS-----KNVPP--EGGEERDFR-----PFAPDF--  
TKNADQYTPGATVQLFYALNACHDLSYQKFD-----  
EADGMGEGWSDIFSLIATLLDDPNVTRN--TPMPVATYVAGSPA--GIRKYPYSTDKAINPSVYFSLAQDEYK--EPHNMGEVWASMLFEVYWNLDVQYGCPIEQ--  
RNLG-----VGNALMLQLIMDGLKQPC-----RPTFVDARNAILLADNNLTGGANQCLIWNGFAKRGLGAAA--  
>AMAG\_16427T0 --RYSVLPITENPDKGPVIVVDGTAIVQTNASPKGWH--ADESQT---FSDTRGNLLAQPNKAG-----NTRKR--DGGALDFT-----AFKPDF--  
SKPAEQYDAAATVQLFYMLNTHDLSYQYGFDEVSNGFQTSNFKGKSNDPVQYAAQDRSGTDNANFATPPDQSKPTTRQYIFTQKTPTRDGVYDLTTPFHEVHMGHINRLTGGPSNTDCLWGGESGGMGEGWDF  
HGVAFTKADS--DRN--AAWGLGAYLGNATA--GIRTPYPSNTQCPNLSYFLAKPDI-----VDELGYDGLFS--ASTA-----  
KGNLSLRLFLDALKIQPC-----NPTFVEARDALISAQQLTKGAYKCLIWKGFAKRGLGSKA--  
>AMAG\_16443T0 ASYSVLPVGIENPNKGSIQVVDSTAVKSNASPOGWH--STGTTSS---YQDTRGNIIQAQPNATSS-----KNVPP--SGGSALDFT-----AYKPDF--  
SKGADQYTPAATVQLFYMLNEAHDLSYQYGFDEASGNFQVNFYKGGAGNDVAIANAQDRSGTNANFATPPDQSQPTTRQYIFTTPTTRDGVYDLTTPFHEFMHGINRLTGGPSNTDCLADGESGGMGEGWDF  
GLWANVLKADT--KRG--TSLPMGAYLVGNSA--GIRTPYPTSDLVCPNLSYLGKSGYD--EVHMIWASMLWEVYWNLDVQYGCPIEQ--ADLT-----  
KGNLGFRLVLDGMLKQPC-----SPTFINARDAILQADANLTGGANCKEIKWGFAGKRGLGSKA--  
>AMAG\_16963T0 --YVPVPGVASTDAGLIMVNSADVLLAKASPOGWH--KAGVSS---FTDTRGNVVAIPNTADPA-----KNVPP--DGGATLDF-----PFAPDF--  
TKSADRYTAGGTVQLFYALNHGARVPV-----  
ASGNFQMDNFKGGG-----  
-----  
>AMAG\_17346T0 -----CYQYGFDEAAGNFQMDNYGKGLDNDAILAHSQDATGINNAVFMPTIDSQPRAQMLLDFDFTTPNRDSDLVIPHHEFFHGVSNRLTGGPANSDWLIQH-----  
FAFVAVNLDNKTIARN--TATPFVYVAGNPT--  
GLRTPFRSDLTVMNSTYS-----  
C-----  
>AMAG\_17415T0 --RYPVIVPGEQSPEKGPLVIVSDAAVLANASPNGW--AYTQGT---FTTTRGNVIAHPNTEEN-----DNGFP--DGGADLDF-----  
PFAPVFATANPKDYAAGSAVELFYLMNVAHDLTYQYGFDEASGNFQVNDYKGGIGGDAIALSQDSTGKNNAVFMPTIDGEPKQVMLFDLTTTPNRDSDFLVPHHEFFHGVSNRLTGGPANSCLSTQEAAGM  
EGWSDMFALAVNLDKQSIIRD--TATPLAAYVAGSPS--GLRTPYPTSDMTVNPSTYSLGLTAYQY--EVHRIGEVWASMLWEVYWNLDVQYGCPIEQ--ANLT-----  
DGNAMWLQLVMDGLKQPC-----NPNMVTARNAILLADLLTGGANCLIWKGFAKRGLGATA--  
>BATDERAFT\_11205 --TYKAIKVPDLSPNDG--FSDIKDPE--YK--SSPNGW---TNG-----TVTEGNAKTIDS-----TKKPPVPATGVDGVDF-----SKFNPA--  
NVTDPDMNQAAAVNLFYLANLMDHDSYQYGFTEAAGNFQDNDFGKGGKGNDAVINVMETSSENALFLTPDQGPGRMAMFRYTTSTEPNRRGLDSDQVIVHVEYHGHSSRLTGGPAAAGCLLEGEARGMSEGSDF  
AMIVTAKESH--KAD--TPIILGAYSDSSS--GVRTHPTTDMKANPFTYSDIGN--NQ--ESYLVGEVWASMLWEVYWNLDVQYGCPIEQ--ADLT-----  
FGNIVTMQNIIGGMMKQPC-----KPTFLSARDAFASDVAHYNGANKCEIKWGFAGKRGLGSKA--  
>BATDERAFT\_12637 ATYKIKLPLGTPDDG--FSNVKDPE--YK--SSPNGW---TDG-----TTTQGNVNDALD-----RKDPPVPGTGVDF-----TKFNSTA--  
DVADPNMQAAAVNLFYLANLMDHDSYQYGFTEAAGNFQDNDFGKGGKGNDAVINVMETSSENALFLTPDQGPGRMAMFRYTTSTEPNRRGLDSDQVIVHVEYHGHSSRLTGGPAAAGCLLEGEARGMSEGSDF  
AMIVTAKQSH--KAD--TPIIGLAAVYKKNPN--GIRSHPYTDMKVNPLTYADVKT--LK--SPHAIGVWASMLWEVYWNLDVQYGCPIEQ--ADLT-----  
FGNIVTMQNIIGGMMKQPC-----HPTFLDARDAFASDVAHYNGANKCEIKWGFAGKRGLGSKA--  
>BATDERAFT\_16271 --YKAIKPLGTPDDG--FSDIKDPE--YK--SSPNGW---TDG-----TTTQGNVNDALD-----RKDPPVPGTGVDF-----SKFNPA--  
DITDPDMNQAAAVNLFYLANLMDHDSYQYGFTEAAGNFQDNDFGKGGKGNDAVINVMETSSENALFLTPDQGPGRMAMFRYTTSTEPNRRGLDSDQVIVHVEYHGHSSRLTGGPAAAGCLLEGEARGMSEGSDF  
AMIVTAKESQ--KSD--TPIAIGTYQGGPE--GIRSHPYTDMKVNPLTYADVKT--RL--EVHDAGEVWASMLWEVYWNLDVQYGCPIEQ--ADLT-----  
SGNITTMQNIIGGMMKQPC-----HPTFLSARDAFASDVAHYNGANKCEIKWGFAGKRGLGSKA--  
>BATDERAFT\_16613 --VYTVVPLGGKGNLQPTPLTYNPN--NII--SSPFGWHDPNSNGES---VPSTRGNVNSRFQISE-----DNDDLTTVHSQSFYFT-----DQDDL--  
TQDPSYIKSVAVNAFYLANLMDHDSYQYGFTEAAGNFQDNDFGKGGKGNDAVINVMETSSENALFLTPDQGPGRMAMFRYTTSTEPNRRGLDSDQVIVHVEYHGHSSRLTGGPAAAGCLLEGEARGMSEGSDF  
ATALEKMTD--TSA--DDKILGAYPKRYGTRKYPYSTNKLNLVYSSING--VN--QTHYVGTWGTILFEVYWNLDVQYGCPIEQ--ADLT-----  
KGNVVLQLVMDGMLKQPC-----NPTFLSARDAFASDVAHYNGANKCEIKWGFAGKRGLGSKA--  
>BATDERAFT\_33981 --SYKVVQLPNSNPEQG--FSVVKDPE--FAG--SSPNGW---TDG-----SRTLGNVNEVD-----PSGRP--GAGQGGIFD-----TNFNAQV--  
DPRTPDMSQASTVNLFYCNLMDHDSYQYGFTEAAGNFQDNDFGKGGKGNDAVINVMETSSENALFLTPDQGPGRMAMFRYTTSTEPNRRGLDSDQVIVHVEYHGHSSRLTGGPAAAGCLLEGEARGMSEGSDF  
LRLVMTAKQGD--KDV--DPVAVGTVYVNSQ--GIRSRPYTDMKVNPLTYADVKT--RN--EVHDAGEVWASMLWEVYWNLDVQYGCPIEQ--ADLT-----  
AGNIIATQVIIGGMMKQPC-----NPNFINAKNAILEADQQYFQGANRCEIKWGFAGKRGLGSKA--  
>BATDERAFT\_36120 --SYKVVPLPKNADDDG--FSLVKNPE--FKA--SSPNGW---SDG-----TSTSGNNIANSV-----SNFNANA--  
DPTDAENVQASAVNLFYIGNLMDHDSYQYGFTEAAGNFQDNDFGKGGKGNDAVINVMETSSENALFLTPDQGPGRMAMFRYTTSTEPNRRGLDSDQVIVHVEYHGHSSRLTGGPAAAGCLLEGEARGMSEGSDF  
AMIVTAKQAN--TPT--TPIVLGDDYVTRNPE--GIRSHPYTDMKVNPLTYADVKT--RD--EVHDAGEVWASMLWEVYWNLDVQYGCPIEQ--ADLT-----  
AGNIIALQVNIIGGMMKQPC-----NPTFLDARDAFASDVAHYNGANKCEIKWGFAGKRGLGSKA--  
>BATDERAFT\_36196 ASYDYVPLGNDPDSGKRAIVFDE--HPD--ASPYGWH--SKGTRDA--YNTTIGNNVFAQNDPDDGNSWR-----NNYRP--SANDKMAFD-----FSIDE--  
KKNPTSYDAITNLFYNNIHLDFYLYGDFEAKGNFQDNDFGKGGKGNDAVINVMETSSENALFLTPDQGPGRMAMFRYTTSTEPNRRGLDSDQVIVHVEYHGHSSRLTGGPAAAGCLLEGEARGMSEGSDF  
ATIVRMTPE--TRN--DDFGMGSYASGRA--GIRKAYSTSFKTNPSTYGLKPLPYLW--EVHAKGEVWASMLWEVYWNLDVQYGCPIEQ--ADLT-----  
TEPGRHLTGLSGNKLALQVVDGLKQPC-----YPTFVSARDAIILLADQGTGMENQCIWNAFAKRGLGSKA--  
>BATDERAFT\_34483 --SYRVIPLGGROPLASKATLVQNF--DKE--ASPLGWHKNDSDSGS-----TSITSGNNVIAHDNSN-----NSNPPSSGLTTANSF-----  
FDQFDDKQDPQSEYKDVASVNTVFFLTYAYHDLIFKYGFDEQSGNFQSNIGGQGRGNDVLAHQDQSGKLNANFMTPPDQGPGRMAMFRYTTSTEPNRRGLDSDQVIVHVEYHGHSSRLTGGPAAAGCLLEGEARGMSEGSDF  
GEGWSDLVALVLEMVESD--TAA--TPKPVGVYVNTDQGIQRFYPTDILTINTHTYSKLS--TR--EVHDAGEVWASMLWEVYWNLDVQYGCPIEQ--ADLT-----  
KGNVVLQLVMDGMLKQPC-----NPTFLSARDAIILLADQGTGMENQCIWNAFAKRGLGSKA--  
>BATDERAFT\_35259 -----GTQLVQNP--DLV--ASPLGWHNTDNGIGN-----IASTFGNNVIAQENRKNQ-----NPILGLRPSVNTFSFQ-----  
FSVNDIKQSPPEYADASVNTVFFLTYAYHDLIFKYGFDEQSGNFQSNIGGQGRGNDVLAHQDQSGKLNANFMTPPDQGPGRMAMFRYTTSTEPNRRGLDSDQVIVHVEYHGHSSRLTGGPAAAGCLLEGEARGMSEGSDF  
GWSVVALSLEVLPTD--TRN--DRRVGAYVNTNPKRGIKRLFPYSTNMMNPHYADVLR--NS--NRHYTGEIWASMLWEVYWNLDVQYGCPIEQ--ADLT-----  
KGNVVLQLVMDGMLKQPC-----NPTFLSARDAIILLADQGTGMENQCIWNAFAKRGLGSKA--  
>BATDERAFT\_27765 --TYKAIQVFPNPDGSDIKDPE--YK--SSPNGW---TNG-----TATQGNVNAVDF-----TKSPAPGTGIDGVDF-----TKFNPE--  
DPNDPDMNQAAAVNLFYIGNLMDHDSYQYGFTEAAGNFQDNDFGKGGKGNDAVINVMETSSENALFLTPDQGPGRMAMFRYTTSTEPNRRGLDSDQVIVHVEYHGHSSRLTGGPAAAGCLLEGEARGMSEGSDF  
-----TRVILGAYVINKPE--GIRSHPYTDMKVNPLTYADVKT--RT--ELHEAGEVWASMLWEVYWNLDVQYGCPIEQ--ADLT-----  
AGNIVAMQNVGMLMHQPC-----SPSLVNRDAIISADAAHYNGANKCEIKWGFAGKRGLGSKA--  
>BATDERAFT\_28410 --TYKAIKVPDLSPNDG--FSDIKDPE--YK--SSPNGW---TDG-----TVTQGNVNDALD-----TKKPPVPATGVDGVDF-----TKFNPA--  
NVTDPDMNQAAAVNLFYIGNLMDHDSYQYGFTEAAGNFQDNDFGKGGKGNDAVINVMETSSENALFLTPDQGPGRMAMFRYTTSTEPNRRGLDSDQVIVHVEYHGHSSRLTGGPAAAGCLLEGEARGMSEGSDF  
ATIIITAKQSH--KAD--TPIIGLAAVYDNTN--GVRSHPYTDMKVNPLTYADVKT--RE--KSHVGEVWASMLWEVYWNLDVQYGCPIEQ--ADLT-----  
FGNIVTMQNIIGGMMKQPC-----HPTFLDARDAFASDVAHYNGANKCEIKWGFAGKRGLGSKA--  
>BATDERAFT\_85535 --SYNIVQVNPSPDQG--FSIAKDPE--FAG--SSPNGW---TDG-----SRTSGNNANVDE-----NNGQ--GVGQGGIFN-----TNFDAQS--  
DPRTPENSQSTVNLFYCNLMDHDSYQYGFTEAAGNFQDNDFGKGGKGNDAVINVMETSSENALFLTPDQGPGRMAMFRYTTSTEPNRRGLDSDQVIVHVEYHGHSSRLTGGPAAAGCLLEGEARGMSEGSDF  
ALAIITAKQGD--KDV--DPVAVGTVYVNSQ--GIRSHPYTDMKVNPLTYADVKT--RN--EVHDAGEVWASMLWEVYWNLDVQYGCPIEQ--ADLT-----  
AGNIIATQVIIGGMMKQPC-----NPTFLSARDAIILLADQGTGMENQCIWNAFAKRGLGSKA--  
>BATDERAFT\_5304 --SYNIVGLPRANPTDG--FVVVNNPE--YK--SSPNGW---TAG-----SITKGNADVAR-----RSNVLTPGVGRNGVDF-----TNFDPTG--  
QPTSATNIQASAVNLFYQANMMDHDSYQYGFTEAAGNFQSNFSGKGRGNDVLAHQDQSGKLNANFMTPPDQGPGRMAMFRYTTSTEPNRRGLDSDQVIVHVEYHGHSSRLTGGPAAAGCLLEGEARGMSEGSDF  
AIVLTKSNTD--TST--SNIISGAYASNRRA--GIRMYPTNMMNPHYADVLR--QS--EVHDAGEVWASMLWEVYWNLDVQYGCPIEQ--ADLT-----  
AGNIVLQLVMDGMLKQPC-----NPTFLSARDAIILLADQGTGMENQCIWNAFAKRGLGSKA--  
>BATDERAFT\_5302 ASYKVIPIKVDVNDG--FEMVKNPE--FNA--SSPNGW---TDG-----QETTGNVLAADQ-----TSGTP--SSGVNGVDF-----SSFNPQE--  
DPRTAANVKAASAVNLFYIGNVMDHDSYQYGFTEAAGNFQDNDFGKGGKGNDAVINVMETSSENALFLTPDQGPGRMAMFRYTTSTEPNRRGLDSDQVIVHVEYHGHSSRLTGGPAAAGCLLEGEARGMSEGSDF  
AMYLTKSNTD--VAT--TPIVMAAYATGDAS--GIRSHPYTDMKVNPLTYADVKT--RD--EVHDAGEVWASMLWEVYWNLDVQYGCPIEQ--ADLT-----  
AGNIIALQVNIIGGMMKQPC-----NPTFLDARDAIISADAAHYNGANKCEIKWGFAGKRGLGSKA--

>BATDEDRRAFT\_1614 -TYKAIQVPGFNPNDGGFSDIKDPE-YKP-SSPNW---TNG-----TATQGNVNAVDF-----TKSPPAGTGIDGVDF-----TKFNPEA-  
DPNDPDNMQAAAVNLFYIGNLMDHITYQYGFTEAAGNFQDNDFKGGKGDVAVLTPSDGQPGKMKMFRFRVKNRSGGLDNQVPLHEYGHVSTRLTGGS LAPL CMSGHETRMSEGSWDF  
AMIVTAKESD--KAD-TPVILGAYVINKP-GIRSHPYTDMKINPLTYGDLKT--RT-ELHEAGEVWAAMLWEVYVWNLVTKSGFSTNL YD-AGKG-----  
AGNIVAMQNVGMLMHQPC-----SPSLVNARDAIASDAAYNGANKCEIWKGF AKRGLGVNA-  
>BATDEDRRAFT\_1616 -TYKAIQVPGFNPNDGGFSDIKDPE-YKP-SSPNW---TNG-----TATQGNVNAVDF-----TKSPPAGTGIDGVDF-----TKFNPEA-  
DPNDPDNMQAAAVNLFYIGNLMDHITYQYGFTEAAGNFQDNDFKGGKGDVAVLTPSDGQPGKMKMFRFRVKNRSGGLDNQVPLHEYGHVSTRLTGGS LAPL CMSGHETRMSEGSWDF  
AMIVTAKESD--KAD-TPVILGAYVINKP-GIRSHPYTDMKINPLTYGDLKT--RT-ELHEAGEVWAAMLWEVYVWNLVTKSGFSTNL YD-AGKG-----  
AGNIVAMQNVGMLMHQPC-----SPSLVNARDAIASDAAYNGANKCEIWKGF AKRGLGVNA-  
>BATDEDRRAFT\_5299 -TYKAIPIPLGSPDDG-FSNKDPPE-YKP-SSPNW---ING-----TLTRGNAAEAVNT-----ANTPSTPGTGINGVDF-----SKFNPAT-  
DINDADNIQATAVNLFYLANLMDHITYQYGFTEAAGNFQDNDFKGGKGDVAVLTPSDGQPGKMKMFRFRVKNRSGGLDNQVPLHEYGHVSTRLTGGS LAPL CMSGHETRMSEGSWDF  
AMIVTAKESD--KAD-TPVILGAYVINKP-GIRSHPYTDMKINPLTYGDLKT--RT-ELHEAGEVWAAMLWEVYVWNLVTKSGFSTNL YD-AGKG-----  
AGNIVAMQNVGMLMHQPC-----NTNFIDARDAIVAADVAHYDANKCEIWKGF AKRGLGVNA-  
>BATDEDRRAFT\_5305 ATYKVIPLGSPDDG-FSSVKNPE-YKP-SSPNW---IDK-----ASTEGNANTINS-----FKIPRGPETSVGGVDF-----TKFNSTA-  
DPNPNANMMAAVNMFYANLMDHITYQYGFTEAAGNFQDNDFKGGKGDVAVLTPSDGQPGKMKMFRFRVKNRSGGLDNQVPLHEYGHVSTRLTGGS LAPL CMSGHETRMSEGSWDF  
AMIVTAKESD--KAD-TPVILGAYVINKP-GIRSHPYTDMKINPLTYADLQT--RK-LAHDMGEVWAAMLWDIYVWNLVTKSGFSTNL YN-AGKG-----  
FGNVTMNMIGGMMMLQPC-----NPTFIDARDAIASDAVHYKANKCEIWKGF AKRGLGVKA-  
>BATDEDRRAFT\_5317 -TYKAIPIPLGSPDDG-FSNKDPPE-YKP-SSPNW---TNG-----TLTRGNAAEAVNT-----ANTPSTPGTGINGVDF-----SKFNPAT-  
DINDADNIQATAVNLFYLANLMDHITYQYGFTEAAGNFQDNDFKGGKGDVAVLTPSDGQPGKMKMFRFRVKNRSGGLDNQVPLHEYGHVSTRLTGGS LAPL CMSGHETRMSEGSWDF  
AMIVTAKESD--KAD-TPVILGAYVINKP-GIRSHPYTDMKINPLTYGDLKT--RG-EVHAGEVWAALAWEIYVWNLIAKNGFSTNL YD-AGKS-----  
AGNIVAMQNVGMLMHQPC-----NTNFIDARDAIVAADVAHYDANKCEIWKGF AKRGLGVNA-  
>BATDEDRRAFT\_1501 -TYEAIPLNLSPGMNRFANITNPE-YSA-SSPNW---TNG-----NFTQGNVNAVDF-----SQSPPAGTGINGMFA-----TKFNPNV-  
EPDNDNIQAAAVNLFYLANLMDHITYQYGFTEAAGNFQDNDFKGGKGDVAVLTPSDGQPGKMKMFRFRVKNRSGGLDNQVPLHEYGHVSTRLTGGS LAPL CMSGHETRMSEGSWDF  
AMIVTAKESD--KAD-TPVILGAYVINKP-GIRSHPYTDMKINPLTYADLKT--RK-EVHAGEVWAALAWEIYVWNLIAKNGFSTNL YD-AGKS-----  
SGNIVTMNMIGGMMMLQPC-----NPSLVDARDAIASDVSHYKANKCEIWKGF AKRGLGVKA-  
>BATDEDRRAFT\_1480 -TYKAIPLRPLSPNDG-FSNVKNPE-YKA-SSPNW---TDG-----TVTEGNVNAEY-----GGELPVTGTVGKGVDF-----TKFNPTA-  
EPKDPNDNIQAAAVNLFYLANLMDHITYQYGFTEAAGNFQDNDFKGGKGDVAVLTPSDGQPGKMKMFRFRVKNRSGGLDNQVPLHEYGHVSTRLTGGS LAPL CMSGHETRMSEGSWDF  
AMIVTAKESD--KAD-TPVILGAYVINKP-GIRSHPYTDMKINPLTYADLKT--RQ-EVHAGEVWAALAWEIYVWNLIAKNGFSTNL YD-AGKS-----  
SGNIVTMNMIGGMMMLQPC-----NPSLVDARDAIASDVSHYKANKCEIWKGF AKRGLGVKA-  
>BATDEDRRAFT\_1483 -TYKAIKVPGLTPDDG-FTSIRNPE-YSA-SSPNW---TDG-----TTTEGNVVALDL-----RSRTPIPGTGVDGVDF-----SKFNPKT-  
EFTPEPNMQAIAVNLFYVNLMDHITYQYGFTEAAGNFQDNDFKGGKGDVAVLTPSDGQPGKMKMFRFRVKNRSGGLDNQVPLHEYGHVSTRLTGGS LAPL CMSGHETRMSEGSWDF  
AMIVTAKESD--KAD-TPVILGAYVINKP-GIRSHPYTDMKINPLTYADLKT--RQ-EVHAGEVWAALAWEIYVWNLIAKNGFSTNL YD-AGKS-----  
SGNIVTMNMIGGMMMLQPC-----YPTLIDARDAIASDVSHYKANKCEIWKGF AKRGLGVKA-  
>BATDEDRRAFT\_1489 -TYKAIKVPGLTPDDG-FSDIKDPE-YKP-SSPNW---TDG-----TVTQGNVVALDY-----TKKPPVPANGVDGVDF-----TKFNPTA-  
NVTDPNDNIQAAAVNLFYITNLMDHITYQYGFTEAAGNFQDNDFKGGKGDVAVLTPSDGQPGKMKMFRFRVKNRSGGLDNQVPLHEYGHVSTRLTGGS LAPL CMSGHETRMSEGSWDF  
AMIVTAKESD--KAD-TPVILGAYVINKP-GIRSHPYTDMKINPLTYADLKT--RQ-KSHDMGVWASMLWEVYVWNLVTKNGFSTNL YD-AGKG-----  
FGNIVTMNMIGGMMMLQPC-----DPTFLSARDAIASDVARYNGANKCEIWKGF AKRGLGVKA-  
>BATDEDRRAFT\_1469 -TYKAIKLPDLNPDG-FSDIKDPE-YKP-SSPNW---TNG-----TVTEGNNAKTVDY-----TKKPPVPANGVDGVDF-----TKFNSTA-  
DVTDPNDNIQAAAVNLFYVANLMDHITYQYGFTEAAGNFQDNDFKGGKGDVAVLTPSDGQPGKMKMFRFRVKNRSGGLDNQVPLHEYGHVSTRLTGGS LAPL CMSGHETRMSEGSWDF  
AMIVTAKESD--KAD-TPVILGAYVINKP-GIRSHPYTDMKINPLTYADLKT--LK-SPHAIQVWASMLWEIYVWNLVTKNGFSTNL YD-AGKG-----  
AGNIVTMNMIGGMMMLQPC-----HPTFLDARDAIASDVARYNGANKCEIWKGF AKRGLGVKA-  
>BATDEDRRAFT\_1593 -TYKAIKVPDLSPDDG-FSDIKDPE-YKP-SSPNW---TDG-----TTTQGNVVALDL-----RKDPPVPANGVDGVDF-----TKFNSTA-  
DVTDPNDNIQAAAVNLFYVANLMDHITYQYGFTEAAGNFQDNDFKGGKGDVAVLTPSDGQPGKMKMFRFRVKNRSGGLDNQVPLHEYGHVSTRLTGGS LAPL CMSGHETRMSEGSWDF  
AMIVTAKESD--KAD-TPVILGAYVINKP-GIRSHPYTDMKINPLTYADLKT--LQ-KSHDMGVWASMLWEIYVWNLVTKNGFSTNL YD-AGKG-----  
AGNIVTMNMIGGMMMLQPC-----HPTFLDARDAIASDVARYNGANKCEIWKGF AKRGLGVKA-  
>BATDEDRRAFT\_14272 -----  
LHEYGHVSTRLTGGS LAPL CMSGHETRMSEGSWDF AMIVTAKESD--KAD-TPVILGAYVINKP-GIRSHPYTDMKINPLTYGDLKT--RT-ELHEAGEVWAAMLWEVYVWNLVTKSGFSTNL YD-  
AGKG-----AGNIVAMQNVGMLMHQPCPKYPSGWSHLVNARDAIASDAAYNGANKCEIWKGF AKRGLGVNA-  
>BATDEDRRAFT\_11777 -SYRVIPLGGRDPKTSSTALIRNPV-DST-ASPFQWHDLNNNGDGS-----VSIITRGNVVAHDNSN-----RRDNPNTGLVTAQNDF-----  
FDFKFDNDQEPQYKQDASITNVFVLSNSYHDLFKYGFDEQAGNFQINAGGSGRNDGIAHQQDGERFNANFATPPDQGRPMRMRFLFNKSRPRRDSGLDNGIVLHELHGLSTRLTGGPSNSNLQFTEAGGM  
GEGWSDIVALVLEMLPTD--TPD-TTKVGGYSTNDPRAGVRFNPGYSTSTSNVPSYARIRR--NT-EVHAIGEIWASMLWEVYVWNLVEKLGFSSTNKKDDAKSG-  
KGNLFLQLIVDGMKLPQC-----NPTLIQARDAIQADKVAAGNSGFCITRGLFAGRMGIRA-  
>BATDEDRRAFT\_1639 -TYKAIKVPGLSPKDDGGFSDIKDPE-YKP-SSPNW---TDG-----TTTEGNNAVDL-----RPRTPVPGAGVDGVDF-----TSFDPKT-  
DIDNENLQATAVNLFYVANLMDHITYQYGFTEAAGNFQDNDFKGGKGDVAVLTPSDGQPGKMKMFRFRVKNRSGGLDNQVPLHEYGHVSTRLTGGS LAPL CMSGHETRMSEGSWDF  
AMIVTAKESD--KAD-TPVILGAYVINKP-GIRSHPYTDMKINPLTYADLKT--RE-EVHDMGELWAAMLWEVYVWNLVTKNGFSTNL YD-AGKG-----  
AGNIVTMNMIGGMMMLQPC-----KPTFLSARDAIASDVARYNGANKCEIWKGF AKRGLGVKA-  
>BATDEDRRAFT\_5372 -----  
LHEYGHVSTRLTGGS LAPL CMSGHETRMSEGSWDF AMIVTAKESD--KAD-TPVILGAYVINKP-GIRSHPYTDMKINPLTYGDLKT--RT-ELHEAGEVWAAMLWEVYVWNLVTKSGFSTNL YD-  
AGKG-----AGNIVAMQNVGMLMHQPC-----SPSLVNARDAIASDAAYNGANKCEIWKGF AKRGLGVNA-  
>SPPG\_01665T0 -SYTVADFRGADPTQO-IITVKDPA-NAV-ASPKGWH--NDGTTA-----FTETRGNAFAYNS5-----GGSVTKAGGAQNNY-----TKYDVNA-  
NANTASNKQAAIANVYVANSMDLIFYQYGFTEAAGNFQVSNNGKGRNDVAVISAQDPQNNANFATPPDQGRPMRMRFLFNKSRPRRDSGLDNGIVLHELHGLSTRLTGGPSNSNLQFTEAGGM  
ALFVQRATH--TRD-TDLVMGDWVTGNPR-GIRTPQYTSLQRNLTLYSTVGR--LN-EVHAIGEIWASMLWEVYVWNLVTKSGFSTNL YD-AGKG-----  
KGNIVAFQLFVDSLALQPC-----NPTMIAARDAIQADENRYDGYKCAIWKGF AKRGMGANA-  
>SPPG\_02641T0 ATYHVPLGINDPESEGRVLRDPA-HPL-ASPMGWH--NQNGGQ--HTVTIGNNVYAHENLEGTSSWV-----DNHRP--DGTVSLTFD-----FPIDF-  
KKQPSYDLAIVNLFYVWNAIHDLVYGFDEKAGNFQDNDFKGGKGDVAVLTPSDGQPGKMKMFRFRVKNRSGGLDNQVPLHEYGHVSTRLTGGS LAPL CMSGHETRMSEGSWDF  
ALVTRTTPNS--TRH-DNFMGGEYANGG-Y-GIRKYYKSDKINPSTYGFITRPGYV-GVHAKGEVWAEIYEVWNLVTKNGFDPDWFN-TGYKVSPEYTHYRFRDFTGQLQPRRDKQNTKG--  
GNILALQLVVDGMKLPQC-----YPTFVDARDAIQADELNDNGENLCTLEAF AKRGLGVDAK-  
>SPPG\_04344T0 -KYRALPFGSKNVQDTPVLIANFP-NPA-SSPLGWHVDGAGS-----LPTVGNVVAQENRKN-----AKNPLNKRPIALDFN-----FDFPVDL-  
SKEPTTYDASVNTMFMFLSYFHDMTYKGFTEAAGNFQATNLKGGKGRDPVVAQENRKNANFATPPDQGRPMRMRFLFNKSRPRRDSGLDNGIVLHELHGLSTRLTGGPSNSNLQFTEAGGM  
GVSGMTAKD--NRN-TDKPVGQYVTSYKPK-GVRGIPYSTNQTNSLTYETLNDPKFA-AVHQVGTWNTMFLFAYVWNVDAKGFTEFNDGQPSG-  
KGNALMQYVVDGLKLPQC-----NPTMIQARDAIAAEKALTKGDNMLLMTAF AKRGLGATA-  
>Hp\_gm\_ctg00587-0.7 -SYRAVAVNRDPRTPSPSLQNP-FDQ-ASPLGWHVDGAGS-----QPVTGNNVAVARDNSKNDN-----NPNSGFITAKFDFD-----  
FAMDDTTQPPQYKASITQAFIANYHDLISKYGFTEAAGNFQVNLGRGGVNDVIANVQDGSNTNANFATPPDQGRPMRMRFLFNKSRPRRDSGLDNGIVLHELHGLSTRLTGGPSNSNLQFTEAGGM  
GWSDSVALTEMTAAD--TPN-TDKAVGQYVSNQGRVQFPYSTLQRNPLTADAVK--NP-EVHAIGEIVWASMLFEVYVWNLVTKNGFDPDWFN-TGYKVSPEYTHYRFRDFTGQLQPRRDKQNTKG--  
KGNVTLQAVVDGMKLPQC-----NPTFVQARDAIKLADVVRNKGANQCEIWKGF AKRGLGIN--  
>Hp\_gm\_asm134-0.164 ASYTVPLGNDPADGPRVKNLPA-HHD-ASPYGWN--SKGKKGHSYNTVTVGNVVAQENLDGGSQWR-----ANYRP--TASDLDTFD-----FAVDL-  
KKQPSYLDASI-----  
FQENYGRGGKGDVAVIANQDGSYNNANFATPPDQGRPMRMRVWASQPYRDGDEGGIITHEYLHGVSTRLTGGS LAPL CMSGHETRMSEGSWDF AMIVTAKESD--KAD-TPVILGAYVINKP-GIRSHPYTDMKINPLTYGDLKT--RT-ELHEAGEVWAAMLWEVYVWNLVTKSGFSTNL YD-  
GIRKHIYSTLKTNPSTYGFTKKPDYV-EVHAKGEVWAALIEVYVWNLIDKHGFEFDYFN-VNYG-----KD--NNLVGLKGNLAFQLVMDGLKLPQC-----  
YPTFVDARDAIILADQIGTRGANQCEIWTAF AKRGLGATA-  
>Hp\_gm\_asm210-2.29 ASYRVVPIITNDVSKG-TLLHNPE-YQG-SSPLGWL--SDGATS-----YITTKGNNAVDNRPAL-----ARSPTIYGTQNNVDF-----SSFNAQ-  
QPDATVNIQASAVNLFYVANIMHDSIQYGFTEAGNFQDNDFKGGKGDVAVLTPSDGQPGKMKMFRFRVKNRSGGLDNQVPLHEYGHVSTRLTGGS LAPL CMSGHETRMSEGSWDF  
ALIVTARPGM--NRN-TPVILGAYVINKP-GIRSHPYTDMKINPLTYADLKT--RQ-EVHAGEVWAALAWEIYVWNLIAKNGFSTNL YD-AGKS-----  
AGNIVTMNMIGGMMMLQPC-----NPTFTTARDAIILADALYGGQKCLIKWAFARRGLGVA-  
>Hp\_mkr\_asm210-snap-2.3 ASYTVPLGNDPADGPRVKNLPA-HHD-ASPYGWN--SKGKKGHSYNTVTVGNVVAQENLDGGSQWR-----ANYRP--TASDLDTFD-----FAVDL-  
KKQPSYLDASI-----  
FQENYGRGGKGDVAVIANQDGSYNNANFATPPDQGRPMRMRVWASQPYRDGDEGGIITHEYLHGVSTRLTGGS LAPL CMSGHETRMSEGSWDF AMIVTAKESD--KAD-TPVILGAYVINKP-GIRSHPYTDMKINPLTYGDLKT--RT-ELHEAGEVWAAMLWEVYVWNLVTKSGFSTNL YD-  
GIRKHIYSTLKTNPSTYGFTKKPDYV-EVHAKGEVWAALIEVYVWNLIDKHGFEFDYFN-VNYG-----KD--NNLVGLKGNLAFQLVMDGLKLPQC-----  
YPTFVDARDAIILADQV-----

#####

# S41

#####

>BATDERAFT\_37569 NMGVIKLDDEFPDTPIDAESIDPAIRIIRSL SKELKDT--KSVVFEIRSNPGGYITFAD--MLPQLF---KPD-----FEPFGARYLMNNVT-----HNIF---  
VEGKDP5--DIWAQVSETP---AG-SRYTKIGDFTAEATNTYQAYYRP---  
MGVFTDGNCFSACELFSANVQNDYDAGITFGEDGNTGGGGANILDVDPALMLDPPDFKQFPFTNELTWKPTSGYKMNRLSVGRQSRVNRNGKYNGQLIEDLGKTKDVIW  
>BATDERAFT\_35365 NLGIIKLEDFSPNTLKTGALADVEAVREIHKLLSTVLKDT--NAVVFDIRANGGSGEFAN-AIQPLF---KPD-----FQPMPLYMNSVA-----YNTL---  
VNGTYFF--DTSNPWYKTP---PG-SKYSIDHRTSYNQSNLYGQAYLKP---  
VGAFTNAMCYSAACEVFSALQSFETGYVFGEDGTTGGGGADMFLDSELLVFNHV-----  
>BATDERAFT\_22176 NLGIIKLDFFMPKPKLKTADAPADVEAVREIHKLLSTVLKNT--NAVVFDIRANGGSGEFAN-AIQPLF---KPD-----FQPTQVRYLMNSVT-----YNTL---  
VNGTRFF--DTSNPWYKTP---PG-SKYSIDHRTSYNQSNMYGQAYLKP---  
VGAFTNAMCYSAACEVFSALQSFETGYVFGEDGTTGGGGADMFLDSELLVFNHV-----  
>BATDERAFT\_26098 NLGIIKLEDFSPRNLKTGARANAEEAVREIHRLLSTVLKDT--NAILFDIRNGPGGGQFSS-AIQPLF---KPD-----FQPVLYRYLMSSVA-----YNTL---  
VNGSQSF--DTSNPWYKTP---PG-SKYSVDHVKNFSFNQANMYGQAYLKP---  
VGAFTNAMCYSAACEVFSALQSFETGHIHFGEDGTTGGGGADMFLDP-----  
>BATDERAFT\_27937 NLGIIRLDDFSPNTLKTADAPADTEAVREIHKLLSTVLKNT--NAIFDLRANGGSGEFAN-AIQPLF---KPD-----FQPMPLYMNSVA-----YNTL---  
VNGTYFF--DTSNPWYKTP---PG-SKYSIDHRTSYNQSNLYGQAYLKP---  
VGIFTDVAVCYACDLFSASIQSSETGHVFGEDGTTGGGGADMFLDPELLF-----  
>BATDERAFT\_28623 NMGIIKLSFECTSRTTNTLMSVLEAIREVRGLLKTVLKDT--NSILDVREGGGGSMRFAN-AIQPLF---KSN-----IEPFVKVYLRNKVT-----YNYM---  
VKSPIDL--RSSRNWSKTS---PDDSKYSLFHDFDTPENIITCSKVYTKP---MGVFTSGDCVSAACEIVAGTVQSYDITGVFGEIITTAGAGAVNWLDPDLIFYDPTDFKMPFKKELTSH-  
NKEAFYNQMTV-----  
>BATDERAFT\_28625 NMGIIKLSFECTSRTTNTQKVSEGVLEVRLLKTVLKDT--NSILDVREGGGGSMDFAN-AIQPLF---KSN-----IEPFVKVYLRNKVT-----YNYM---  
VKSPIDL--RSSRNWSKTS---PDDSKYSLFHDFDTPENIITCSKVYTKP---MGVFTSGNCASACEIVAGTVQSYDITGVFGEIITAGAGAVNWLDPDLIFYDPTDFKMPFKKELTSH-  
NKEAFYNQ-----  
>BATDERAFT\_23310 NLGIIKLSFMPTNLKTGAPADTEAVREIHKLLSTVLKDT--NAVIFDLRANGGSGDLAN-AIQPLF---KPD-----FQPMPLYMNSVA-----YNTL---  
VNGTYFF--DTSNPWYKTP---PG-SKYSVNCNRTSYNQSNLYGQAYLKP---  
VGIFTDVAVCYACDLFSASIQSSETGHVFGEDGTTGGGGADMFLDPELLF-----  
>BATDERAFT\_23534 NMGIIKLSFECTSRTTNTROIPEAIREVRKLLTTLVKKT--NSILDVREGGGGSMFAN-AIQPLF---KSK-----LEPFQVYKLMNDVT-----YNYF---  
VHPPIDL--KSSRDANFKTP---AK-SKYSLHFDFDPRASNIYDQVYTKP---  
VGVFTSGNCSACEIMTGMQSFKIGTVFGEDVTTAGSGANVWLDPELIDC-----  
>BATDERAFT\_23544 NMGIIKLSFKCTSRTTNTROIPEIREVRKLLTTLVKKT--NSILDVREGGGGSMFAN-AIQPLF---KSK-----LEPFQVYKLMNDVT-----YNYM---  
VHPPIDL--KSSRDANFKTP---AK-SQYSVHFDFDPRASNIYDQVYTKP---VGVFTSGDCMSACEIMTGMQSFKIGTVFGEDVTTAGSGANVWLDPELITHDPTDFKMPFKKELTSD-  
TKEIFYNK-----  
>BATDERAFT\_23754 NLGIIRLDDFMPNTLKTGAPADMEAVREIHKLLSTVLKDT--NAVIFDLRANGGSGEFAN-AIQPLF---KPD-----FQPTPMRYLMSSIA-----YNTL---  
VNGTYFF--DTSNPWYKTP---PG-SKYSIDHRTSYNQSNLYGQAYLKP---  
VGIFTDVAICYACDLFSASIQSSETGHVFGEDGTTGGGGADMFLDPELLFNPID-----  
>BATDERAFT\_28775 NLGIIRLDDFVPKNLKTADAPADTEAVREIHKLLSTVLKDT--NAVIFDLRANGGSGDFAN-SIQPLF---KPD-----FQPMILRYLMNSVT-----YNTL---  
VNGTYFF--DTSNPWYKTP---PG-SKYSVDHVDTPFDPRANMYGQAYLKP---VGIFTDVAICYACDLFSASIQSSETGHVFGEDGTTGGGGDFTSLDSYLLFNHDFQPMYAKELTDN-  
TTGQSYTN-----  
>BATDERAFT\_24156 NLGIIRLEDFAPNTLKTGAPANMEAVCEIHRLLSTVLKDT--DAVVFDIRANGGSGEFAN-AIQPLF---KPD-----FQPMPLYMNSVA-----YNTL---  
VNGTFFV--DTSNPWYKTP---PG-SKYSVNFDKTSFNQSNLYGQAYLKP---  
VGIFTDVAVCYACDLFSASIQSSETGYVFGEDGTTGGGGADTFSLDQLLFPVDF-----  
>BATDERAFT\_24207 NLGVIKLSHFLPFHFFGRGVEEAIFEIHNLLSTVLKDT--NAIVFDRVNTGGMSEFAN-GILQFF---KPD-----FQPMQSRFLMKNLT-----YSTL---  
VNGTRSF--DTAIDANWKT---PG-SKYSIPYNISSFDKANLYGQAYLKP---VAALDTATCRSECDLFAVLSQSSSETGYVFGEDGTTGGAGADVFLDPLLMFFDPTDFKMPYFDYLSGTG-  
N-----  
>BATDERAFT\_24985 NMGIIKLESFSTRLATNVPVPEGVLEVRKLLTTLVKKT--KSLVDVREGGGGAMGFSS-GIPQLF---KAD-----FQPFKATYLMNNVT-----YNYM---  
VNPPIDL--ETSRDANWKT---PG-SKYSVLHDLIDPKSANDYQVYTKP---  
MGVFTTGDGCFSAEVMTSVQSGVGTGFGEDSTTGGGGANVWLDPELINF-----  
>BATDERAFT\_25222 NLAVVRLDTPMPSVNHSTLTPVADTLVLRLLTHQLKYT--RALVLDIRSNGGLYDFAS-QIPQFF---KPD-----HHPLQMQLYNNAT-----YSLF---  
VNHTSVA--SPFYNAWLSKP---PG-SNYTMDIDVPMQSVNLIQMYLRP---MGVFNNGGCSACEMFTASIQDHNIGTVFGEDGTTSGSGLSFDTP-  
DLVSHNPVDFTPAPYTNLSPDQTKA-----  
>BATDERAFT\_25462 NMGIIRLASFCTSRRTNTQNTLEALEVERLLKTVLKDT--NSILDVREGAGGCPIFAN-VILQFF---KSD-----IEPLVKVYLINKVT-----SNMF---  
SNSHEGL--ETSCDANWKT---AG-SKYSVLHYVDPKELGTNPIYDKP---MGVFTNNGCVSAACEVMTESVQSFIGTVFGEDVTTAGAGANVWLDPELIFYDPTDFKMPFKKELTSD-  
TKEIFY-----  
>BATDERAFT\_25463 NMGIIRLASFCTSRRTNTQNTLEALEVTRLLKTVLKNT--NSILDVREGGGGCPIFAN-AIQPLF---KSK-----LEPFQVYKLINKVT-----SNMF---  
ANSPKGL--ETSCDANWKT---AG-SKYSVLHYVDPKELGTNPIYDKP---MGVFTNNGCVSAACEVMTESVQSFIGTVFGEDVTTAGAGANVWLDPELIFYDPTDFKMPFKKELTSD-  
TKEIFY-----  
>BATDERAFT\_25559a NMGIIRLASFCTSRRTNMQNTLEALEVTRLLKTVLKNT--NSILDVREGGGGCPIFAN-AIQPLF---KSK-----LEPFQVYKLINKVT-----SNMF---  
ANSPEEL--KSSRNWSKTP---AG-SKYSVLHYIMDPKELGTNPIYDKP---  
MGVFTSGNCSACEVMTESVQSGIGTVFGEDVTTAGAGANGWLDPELIFYDPTDFKMPFKKELTSD-----  
>BATDERAFT\_25559 NMGIIRLASFCTSRRTNMQNTLEALEVTRLLKTVLKNT--NSILDVREGGGGCPIFAN-AIQPLF---KSK-----LEPFQVYKLINKVT-----SNMF---  
ANSPEEL--KSSRNWSKTP---AG-SKYSVLHYIMDPKELGTNPIYDKP---  
MGVFTSGNCSACEVMTESVQSGIGTVFGEDVTTAGAGANGWLDPELIFYDPTDFKMP-----  
>BATDERAFT\_27246 NLGIIRLDDFMPNTLKTGAPADMEAVREIHKLLSTVLKNT--NAVIFDLRANGGSGEFAN-AIQPLF---KPD-----FQPTPMRYLMSSIA-----YNTL---  
VNGTYFF--DTSNPWYKTP---PG-SKYSIDHRTSYNQSNLYGQAYLKP---  
VGIFTDVAICYACDLFSASIQSSETGYVFGEDGTTGGGGADMFLDPELLFNPID-----  
>BATDERAFT\_26287 NMGIIKLSFGCTSRTTNTLVSFEGIRVVRKLLKTVLKNT--NSILDVREGGGGSDVFAN-AIQPFF---KSN-----IKPFVKVYLISDVT-----YNYF---  
VNMPIDL--KSSRNANWKT---PK-SKYSILHDFDTPKMIISTYDQVYDKP---MGVFTSGNCASACEIMTGTQVSHDITGVFGEDVTTAGAGANIWLDPELITHDPTDFKMPFKKELTSS-  
TKEIFYNKMTVGNRAFRVNRDKKHEKWIETDGIYSDIVI-----  
>BATDERAFT\_85649 NLGIIRLDDFIPKDLKTGARVDEIAREIHKLLSTVLKDT--NAVIFDLRANPGGSGDFAN-AIQPLF---KPD-----FQPMPLYMNSVA-----YNTL---  
VNGTYFF--DTSNPWYKTP---PG-SKYSIDHRTSYNQSNLYGQAYLKP---VGIFTDVAVCYACDLFSASIQSSETGYVFGEDGTTGGGADVFLNPTLIFYDPTDFKMPYAKELTDK-  
TTGQSYTN-----  
>BATDERAFT\_86001 NLGIIRLDDFMPNTLKTGAPANMEAVREIHRLLSTVLKNT--NSVLDLRANGGNGNAN-AIQPLF---KPD-----FQPTMRYLMSSVA-----YNTL---  
VNGTQSF--DTSNPWYKTP---PG-SKYSIDVDTDFDRANMYGQAYLKP---  
VGIFTDVAVCYACDLFSASIQSSETGHVFGEDGTTGGGGADMFLDPELLF-----  
>BATDERAFT\_86231 NMGVIKLDNFSPLKASTGTDASSVATSFVRLLTHELKDT--SSIVFELRNGPSSILFAN-SLPQLF---KPD-----FDSFGARYLKNVNT-----YNYF---  
VKGSAR--DTWQVWNESE---AD-ARYTNIIPFNSEFAANSYGVYTKP---  
MGVFTDGNCFSAACDLFSANIQHEAGTVFGEDGLTGAGGANILDVDPALVIYSPDTRFQFPFSELNTPATGSYANMLSVGRQSRVNRNGKYNGQLIEDTGKSDIWDV  
>BATDERAFT\_86314 NLGIIRLDDFVPKNLKTGAQADMEGVREIHKLLSTVLKDT--NAVILDLRKNLGGNGNAN-AIQPLF---KPD-----FQPMILRYLMSSVA-----YNTL---  
VNGTSFF--DTSNPWYKTP---PG-SKYSIDHRTSYNQSNMYGQAYLKP---  
VGAFTDAICYACDLFSASIQSSETGHVFGEDGTTGGGGDIFSLDSTLLALNPVDF-----  
>BATDERAFT\_87928 NMGIIKLSFECTSRTTNTQKVSSEGVLEVERLLKTVLKDT--NSILDVREGGGGSLDFAH-EILQLF---KSD-----IEPFVKVYLRNKVT-----FNIF---  
VESPIDL--RSSRNANWKT---PDDSEYSLFHDFDTPEDSGTYNQIYDKP---  
MGVFTSGNCSACEAMTGTQSYNIGTVFGEDATAGSGAIWLDPELIFYDPT-----  
>BATDERAFT\_89445 NMGIIELTSFGCTSRTTNTQKIPKLEVERLLKTVLKNT--NSILDVREGGGGSMDFAN-GILQLF---KSD-----IEPFVKVYLRNKVT-----FNMF---  
VESPIDL--RSSRNANWKT---AG-SKYSILHDFDTPKMIISTYDQVYDKP---MGVFTSGNCASACEIMAGTVQSYNIGTVFGEDATAGSGAVVWLDPELIFYDPTDFKMPFKKELTSH-  
TNE-----  
>BATDERAFT\_90146 NLGIIRLDDFIPKDLKTGARANAEEAVREIHKLLSTVLKDT--NAVVFDLRANGGSGDFAN-AIQPLF---KPD-----FQPTMRYLMNSVA-----YNTL---  
VNGTYFF--DTSNPWYKTP---PG-SKYSIDHRTSYNQSNLYGQAYLKP---  
VGAFTDAICYACDLFSASIQSSETGYVFGEDGTTGGGGADVFLNPTLIFYDPTDFKMPYQYQELTDE-----  
>BATDERAFT\_92476 NMGIIKLSFECTSRTTNTROIPEAIREVRLLKTVLKDT--NSVLDVREGGGGSMRFAN-DIPQLF---KSK-----LEPFVKVYLRNKVT-----YNYM---  
VHPPIDS--RSSRNANWKT---PK-SKYSVLHDLTDLKTSITDQVYTKP---MGVFTSGDCASACEIMTGTQVQSKLIGTVFGEDVTTAGAGAVVWLDPELIFYDPTDFKMPFKKELTSH-  
TKDFTYNKMTVGHRLVRSGDHKKPVDEVDGIASDI-----  
>BATDERAFT\_92744 NLGIIRLEDFMPKPKLKTADAPADVEAVREIHKLLSTVLKNT--NAVIFDIRANGGSGEFAN-AIQPLF---KPD-----FQPTQVRYLMNSVT-----YNTL---  
VNGTYFF--DTSNPWYKTP---PG-SKYSIDHRTSYNQSNLYGQAYLKP---  
VGAFTNAMCYSAACEVFSALQSFETGYVFGEDGTTGGGGADMFLDSELLVFNHV-----  
>BATDERAFT\_92841 NMGIIKLSFECTSRTTNTLMSVLEAIREVRGLLKTVLKDT--NSILDVREGGGGSMRFAN-AIQPLF---KSN-----IEPFVKVYLRNKVT-----YNYM---  
VKSPIDL--RSSRNANWKT---PDDSKYSLFHDFDTPENIITCSKVYTKP---MGVFTSGNCASACEIVAGTVQSYDITGVFGEIITAGAGAVNWLDPDLIFYDPTDFKMPFKKELTSH-

NKEAFYQ-----  
>BATDERAFT\_93324 NMGIKLTSFMPTSRRTNTRDVLKAIEREVRLKTVLKDT-NSVLIDVREGGGGCANFAN-GIPQF---KSK-----LEPFVKVYLRNDVT-----YMF--  
VHPPIDS--KASHDAWLKIS---PK-NKYVSLHDLTPENTMTYNQYTKP---MGVFSGDCCASACEIMTGTQVQSKFJGTVFGEVDTAGSGANIWLDPKLNHDPDFKMPMPFRETLSH-  
TKDTFYNKMTVGHRLVRSGDHKGPVEDVGIASDI--  
>SPPG\_00409T0-----IMEVYDGIQQLKA-----QGA-KRLLDWTDNGGGWGLGYFAVATLFPNVKRD-----VATFRMTPLLKMLM-----TAAEFKDLNETTPL--  
TMFGPSNFVDP-----ATGLSLTSADLNRLILKTHKET---FGKYTSEYSDVSVVDGGIADPKRPHNNAWATGIPPPVTPVFPVENVVVLTNGLCGSTCAHSARLHIDEVGVKVFV-  
>SPPG\_05166T0 NLGFIRLASFTEVDVEPKV-----AVNAIRDLLVNELKDT-AGLVIDRVNNGGGYVTAD-TIPOFF---VAD-----YEPTTARALISDN-----VEKGAEG--  
QDWKATYLAN---PG-DKYTGTVFSFKETANKIGQLYLPK---  
VAVFNNAKCYACDMFSAGMQDHEAALIIGEDATTGAGGANVIEHRSY-----  
>SPPG\_06219T0 GLHISTFDG-----SVDDILKWGDDWLNLLAKNNSLKNLIDFCGNGGGKLSGS-ALTFLL---  
NPSEYAPPSGGLPLPTTLKIGEATNSSSYFYKNFFSDLNKNMNTLADMWMTDRPPGTFVPR-  
SRKMYREVLLPRNNEEIRSVAPKEYFNLAIVTDGYCISTCAIVTNQLRAQNTPI-----  
>Hp\_gm\_asm106-0.164 NLGVIRLVDFLPKTPDGNVQVDL-TISLIRDILTSDLKDT-NAVVDVRNPGGAIDIAN-LLPQLF---KPD-----FVPGTARYLRNSIN-----YNLF--  
VQKSPPT--DSWHQANTSSK---DG-DVFSGEVGFDTVPQANQYQAYLRP---MGVFTNGRCYSACDFSAAIQDSNTGLILGEDNFTGAGGANVLQH-TDLQAADPADFNPIVLKELTDS-  
YQSGWSVLTVAIRQAIRSGTHKGLIEDHGITSDDVVV  
>Hp\_gm\_asm236-0.161 NLGIRLENFELNENVNA-----AILLIRSILVGLAET-KAMIVDVRNNGGLITLAD-YLPQLF---GTH-----FTNMGARDLINSVN-----TNIF--  
NSTYYMP--DDFSMAYFSTP---PG-DTYTAVPVFDTDQDSFMGGQAYFKP---VGIFTNGCYACDIFANMQDNELATVFGEDTATGAGGANVVDLNTLFLPLDPTDFLLPYTSSVSL-  
IAQNLVAVRQLVRTGINAGD-----  
>Hp\_gm\_asm80-0.52 NLGIRLASFEPINSVGGYELDAAMTAIRSLVGLPKDT-NSVVIDLRNNGGDLTAN-DIPQLF---KPD-----YNYPGARYLRNSVS-----YDLL--  
VKNSPPT--DSWHVADQTK---TG-DEWSAIALFDPVSDANKIGQVYKPK---AGLTDGGCYACDLSANMQTSGTAIVFGEDETTGAGGANVWTHSTDLVP-  
DATDFHELPTAQLKPNYNDMRT-----  
  
#####  
# Asp  
#####  
>AMAG\_11032T0 QYFAEIQIGTPGQSFVVM--DTGSSNLVWPSTRCSMACWLHRRFDA-----KKSSTFRKNGTHF---GIQYSGS--LEGILSTDTVTIG-  
DLEILDQT---FGESTKEPIAFVAGKF-DGILGLGDYD-IA---VE--KVVP-----PFY-SM-IN--QGLLRHPVFTFWLGDVKN-----DPNAGGEIVFGDIDPAHH-----  
TKGIHYAVVR-----KGYWEVKIEALT-V--GGEDFPL-----LGNATAA-----  
IDTGTSLIAGPKAADAINKLIGAKKNFLGQ-----YIMDC--RKLDS--MPEIAFRFG-----GKDFTLQPEDY-----  
VLKVAASPIGGGGQEQ---CISGFMGIEMPPQLGQ-----WIVGDVFLRKYFTVYDLG--KNRVGFAE-  
>AMAG\_11644T0 QYFAEIQIGTPGQSFVVM--DTGSSNLVWPSTRCSMACWLHRRFDA-----KKSSTFRKNGTHF---AIQYSGS--LEGILSTDTVTVG-  
DLEILDQT---FGESTKEPIAFVAGKF-DGILGLGDYD-TAVEKVV--PPFY-----QM-IN--QGLLRHQLFTFWLGDVKN-----DPNVGGEIVFGDIDPAHH-----  
VGKIHYAVVR-----KGYWEVKMEALT-V--GGEDFPG-----LGNATAA-----  
IDTGTSLIAGPKAADAINKLIGAKKNFLGQ-----YIMDC--KRLDS--MPEIAFQFG-----GKDFALQPEDY-----  
VLKVAASPIGGGGQEQ---CISGFMGIEMPPQLGQ-----WIVGDVFLRKYFTVYDLG--KNRVGFAE-  
>BATDERAFT\_16209 QYFGEIQIGTPPQPTVIF--DTGSSNLVWPSTRCSMACWLHRRFYDA-----SESSTYVNNGTGF---AIQYGTGA--  
LEGVISQDVTIIG-GLTIENQG---FGESVKEPEITFAVGRF-DGILGLGFDT-IS---VQ--KVVP-----PMY-NL-IN--NHQLDTPFLFGVWLGSSSG-----  
EEGGEIVFVAVNDHDF-----KGAVTVPVVR-----KAYWEVELEGVTI--GGKLAIE-----KSSRA---AIDTSSSLFALP-VAEADAINGLGG--  
KKNWNGQ-----FIVDC--ATIDS--LPELTLQFGG-----QKQFVITGSYD-----ILQVSAGPVGGGQD-----  
CISGFMGLDIPAPAGPL-----WIVGDVFLRKYFTIYDVG--NARVGFAE  
>BATDERAFT\_20107 QYFGVVQLGTPPQSFVLF--DTGSANLVWPSTRCTDAPCMNHARYDF-----TRSTFTPNNSPF---AIQYGLGS--  
VTGVISSDQLQA-GINIPNQ---FAEAVTEPNTFLTSSF-DGVLGLGFTA-IS--INN--IPT---MD-NM-IA--RGLIPAGIFGFLTRGGV-----  
SGSSLLTGGIDITHV-----NGAITWIPVVR-----KAYWEVMDSVTL--GKTLTAT-----GSHA---VFDSTGSLIAIP-TVHANQIHOQLGAIPFTNG--  
LQ-----LIPC--SGLPP--ITFALN-G-----VAFTLRNEDY-----VLPP--G--FGY-----  
CVSVFVGLDMNMF-----WILGDSFLKFYITFDV--NGRIGIAN-  
>BATDERAFT\_28537 -----SGEPV---TIKY-KGE-  
EYSGFSSDAAVTIP-GTRITIGIKLPVLSVKQSPDLVGINPKF-DGVFGFYSS-LS--KHH--PQIT-----AMD-VL-YS--NDVIPNEVSLQLCPYDM-----  
LQSFINIGNTDITPK-----CG-TDGSVAVWVDSPT-----NDQFTVNIKSILV--NGEKVEL-----PAEFQKQV-EHGHTLYS---RVETCFLHMRFKVVVVALVNAIVSGAITIK--  
NK-----VLKRKHK--LSPEDIDNIFWKHMLMIRSDFKIKW--EKLPS--LSITMFAEN-PVTDDNRNSVVTIKLGPDKY-----IQRV---D--YTH-----  
DLFSVTAGSNDK-----ATLGIPIFTRLEVTFDLQ--NTRIGFG--  
>BATDERAFT\_87177 -----TEDVL---SDSYFDGS-  
FWKGVSFATVSIIP-KTISITDAPVIGIYQSTRSLVLDQNNHGLGIAYPS-LT--HSKITSAT-----IID-SF-YT--SGSIKKEVAFELCSYEL-----  
SKQSYIDIGNTGVYSK-----CG-TDGSVAVWVETPI-----LNLFTVNIKSILV--NHQKVQL-----PSTFYQNP-SGGITLFS--  
FIDTCAAKILLPRILVMEINEMIKSRAFQPR-----PNLQELKLFYFQDYTMKLEFIDW--KKLPT--ISFLMSTGT-AALQKNPSSIVNITLGPDKY-----LQKA---G--  
PKE-----YFVAVGSDQN-----AALGISFMTRLRILVDRK--NGLVGF--  
>BATDERAFT\_89345 -----SGKTV---TINY-KGD-  
EYNGISSTAATVTP-GTRITIGIDLPLVLEKQSAVLGIDNSLKGQILGFGYSS-LS--DYY--TSVT-----AMD-VL-YK--NDVIPNEIQLCPYEM-----  
LQSFINIGNTDITSK-----CG-TDGSNIAWVESPS-----DGYFSVNIKIOILI--DDKPVNL-----PAGFQKQV-EDGHTLYS---AVETCYMHPFVIVVAALIDAIVCSNAITLD--  
SF-----N--FKHR--LNNQIKSLFKWRHLTAESYFNKIKW--DRLPT--ITITMFTET-PVTDDNRNSVVEIKLGPDKY-----LQRY---N--SEN-----  
LVFAVEVGNPKY-----ATLGISFMTRLRGLVDRK--HARIGFG--  
>BATDERAFT\_26411 -----SGEPV---TIGY-KGD-  
EYNGFSSSTAADVTIP-GTITDINLPVLSVERQSADIVGINPNL-DGIFGFGYTS-LS--NHH--SQTT-----AMD-VL-YT--SDVIPNEIQLCPYEM-----  
TSNSFINIGNTDITPK-----CG-TDGT-----I--NDEQVEL-----PEEFQKQV-EDGHTLYS---SVETCFLHMRFPEVVVVALINAILDSGAITVN--  
IN-----I--FSDK--LKGVMVKKIFSONYAMLESDFIDW--GKLP--LSITMFAEN-PVTDDNRNSVVTIKLGPDKY-----IQRA---G--  
SKNKYLTGVCIRFVAVGSDNNDN-----ATLGIPIFMAQLGLTFDLQ--NKRIGFG--  
>BATDERAFT\_87892 -----SSEKPV---NINY-NDD-  
EYNGVSTATVTP-GTGIAGVNLPLVIAIQKQASLVGIGGKLGQVGFYSS-LS--KHY--SQTT-----AMD-IL-YN--DGVIPNEIQLCPYGA-----  
ALKSSINIGNTDITK-----CG-TDGSVAVWVQSPK-----NNQFSVNIKSILV--NDKSVEL-----PEEFQKQV-EDGHTLYS---SVETCYMHPFVIVVVALINAILDSDAITVK--  
TM-----FKNDHFSKRKIKKLLKQNHLMKSKYSVDW--DKMPT--LSIVMFSQA-PVTDDNRNSVVTITLGPDKY-----MQII---D--SED-----  
FMFTVTACPNDY-----ANLGTSMTRLRILTFDLQ--NQRIGFG--  
>BATDERAFT\_26134 -----LNEEGI---MIEY-KGE-  
EYNFSSSTAADVTIP-GTKIIDMDLPVIAIQKQSPDLIGIGGRIDQGLGFGYSS-LS--KRH--PQST-----AMD-VL-YN--SGIIPKNEIQLCPYGM-----  
LSEFINIGNTDITPK-----CG-TDGSVAVWVQSPS-----ADHHTVNIKSILV--NGKPVLD-----PERFQKQV-ENGRHTLYS---YLQTCFLYMRFPKVVVVALINAILDSDAITVK--  
TM-----FRNDHLGKRKIKRKLKRNHLMSESKYNIDW--GMPT--ISIVMYSPT-PVTDDNRNSVVTITLGPDKY-----MWRY---D--SKH-----  
VRFVAVGSDNY-----ATLGTSMVRLGLTFDR--HKRIGFG--  
>BATDERAFT\_23765 -----GRLV---TIEY-KGK-  
EYRGVSFATVTP-GTITDIGLPPVAVEKQSPDVGISPNF-DGVFGIYPS-LS--KRR--PQTT-----VLD-VL-YN--DGVISNNEIQLCPYGM-----  
RSKSFINIGNTDITAK-----CG-TNGRSVAVWVDSPT-----HGRHSVNIKSILV--NDELVEL-----PEEFQKQV-ENGRHTLYS---YLHTCFLYMRFPKVVVVALISAVDSDAITVK--  
NN-----MLERKR--LNPEDIDNIFWKHMLMRSNFIHIDW--IKLPS--LITMFAQT-PVTDDNRNSVVTITLGPDKY-----IQRV---D--SKH-----  
VRFVTAGSNDN-----AALGISFMTRLRILTFDRV--HKRIGFG--  
>BATDERAFT\_25259 -----SGKTV---TINY-KGE-  
EYSGFSSSTAATVTP-GTITGINLPAILVEKQSPDLIGIGGKLGQVGFYSS-LS--NHH--SQTT-----AMD-AL-YS--NNVIPNEVSIQLCPYEM-----  
LQSFINIGNTDITPK-----CR-TDGSVAVWVQSPS-----TDEFTVNIKSILV--NDKQVLD-----PAGFQKQV-EYGRHTLYS---VIHTCFYIQLPEIVVVALIDAIVDSDAITVK--  
NT-----M--FSNNHLGKRKIKRKLKRNLMFEPNYIDW--NKMP--LSITMFAQT-PVTDDNRNSVVTIKLGPDKY-----MQRI---D--SKY-----  
VRFVAVKISSDY-----ATLGIQFMRILGLTFDLQ--NTRIGFG--  
>BATDERAFT\_27966 -----SGEPV---TIKY-RGK-  
EYNGVSTAAVTP-GTITDINLPILAVEKLSPYLVGIGGTLKQVGFYSS-LS--DRH--SQTT-----AMD-AL-YT--NDVIPNEIQLCPYDM-----  
LQSFINIGNTDITAK-----CG-TDGSVAVWVQSPS-----NDQFSVNIKSMLV--NGKVVLD-----PEEFQKQV-ENGRALYS---YLRTCTYMYLPKVVVVALIDAIVDSNAITFK--  
SI-----L--FKNK--LGGKIKRILQRNSPIPKFDNIDW--GKLP--ITIVMFSQA-PVTDANCNSVVTIKLGPDKY-----IQRV---D--SKN-----  
YLFTVVAAGPNNDN-----VVLGTSMTRLRILTFDRV--HKRIGFG--  
>BATDERAFT\_87185 -----SGQPV---TINY-KGK-  
EYRGFSSSTAADVTIP-GTITDINLPVLSVEKQSAVLGISPDL-DGVFGFYSS-LS--KHH--PPIT-----AMD-VL-YS--NGVIPNEIQLCPYDM-----  
TSDSFINIGNTDITAK-----CG-TDGSIAWVKSPTS-----ADYFTVNIKSILV--NGKRVNL-----PEEFQKQV-EHGHTLYS---IVETCFRYMFPKVVVVALIDAIVDSGAITIK--  
RI-----K--LKRK--LYPEEIDDVFKWGLMAESSFIDW--GKLP--VSTIFAEEN-PVTENRNSVVAIKLGPDKY-----IQRY---D--SKN-----  
FEFVAVKAGSNDK-----AVLGISFMTRLTMFDRA--HKRIGFG--  
>BATDERAFT\_92020 -----SGEPV---TIKY-RGK-  
KYNVSSSTAATVTP-GTRITDINLPVIAVEKQSAIVGISPFG-DGVFGFYSS-LS--KHH--SRVP-----AID-AL-YN--DGAIPNEIQLCPYGM-----

TSEFINIGNTDVTAK-----CG-TDGTSAVWVQSPS-----NDEFTVNIKSILV--NGKKVDL-----PDEFQKKV-KHGHTLYS---VIHTCCTFMHFPRVVVKALVDAIVDSGAITVR--  
KT-----KSEHKRK-LNPEIDGIFLKHLYLWPTSNYNIKW--EKLPS--FSITMFSN-PVTDNRNSVVEIKLGRDYP-----MQRV---D---SEK-----  
VFVAIRVGSNDR-----AVLAISFMTRLLTDFRV--HKRIGFG--  
>BATDRAFT\_12559 QYGRIALGTPPQSFLVQF--DTGSANLWLPSTRCSOPACVKHSQFNR-----LLSSTWTSLTQTF---SIQYGTGS--  
LSGVMSSDTFFYMA-GLTVTNQS--FAESVSPQPTTFINTKY-DGVLGLGMRE-IS--IN-NVAT-----PME-NM-HA--QGLIPAGVFLYLTKNSA-----  
PGSVLTIGGYDPSHV-----DGSITWPLSK-----RQFWQVGLTSVTF--NGTLLIQ-----NAQA-----VFDGSGTSLIAIP--  
TVSATLHQQLGAIPYQNG-----LQILPC--TGLPS-----VTFMLN-----NVSFTLRNEDY-----VIPF---G---FGY-----  
CVSAFVGLDMHGF-----WILGDSFMKLYITFDS--NNRIGIAN-----SYVDRS--  
>BATDRAFT\_87859 -----CG-TDGTSLIWIWESPT-----RKFITVTLRITV--DNQLVKL-----PKGFQRAK-LFTLNQWS---LFDVCSHTQVPTVFEALKAIKTSKAILSH--  
YWFQYAFNGRISIP-GTTIWAQAPITGITIQRPLFMSPNI-NGILGISYPE-NA--RYH-GIHGS-----VID-AF-FN--ENTIDKNEVAIQMCSYSL-----  
THDSYIDIGNKDIKPK-----CG-TDGTSLIWIWESPT-----RKFITVTLRITV--DNQLVKL-----PKGFQRAK-LFTLNQWS---LFDVCSHTQVPTVFEALKAIKTSKAILSH--  
IS-----DLGW--  
EGF-----FCGKLNMP-----NTIKFD--  
>BATDRAFT\_28725 -----CG-TNGKSIANWQSPS-----NSYFSVNIKNILV--NDEPVNL-----PAEFQKKRKNRGLTLYS---VVETFLYMRFPKVVVETLVDAILDSNAITIN--  
LHESFINIGNTDITPK-----CG-TNGKSIANWQSPS-----NSYFSVNIKNILV--NDEPVNL-----PAEFQKKRKNRGLTLYS---VVETFLYMRFPKVVVETLVDAILDSNAITIN--  
NN-----M--LERK-LNDEKIEDIFWKHYLMSEKYFTRW--DKLPT--LSITMFAEN-PVTDNRNSVVTIIRLGRDYP-----MQRV---G---FEK-----  
FAFAVKAGSNDH-----AVLGVSMTRLLKTFDRK--HKRTGFG--  
>BATDRAFT\_25666 -----AVLGVSMTRLLKTFDRK--HKRTGFG--  
QYRIGSSDAAVTIP-GTRITGIDLPIAVEKQSPDLVGINPKF-DGVFGIGYTS-LS--DHH--PQIT-----AMD-AL--HN--DGVIPRNEVGLQLCPYDM-----SGEPV---TIYY-KGK--  
TSEFINIGNTDVTAK-----CG-TDGRSAVWVQSPS-----NDEFTVNIKNILV--NGKQVQL-----PVEFQKKV-EHGRTLYS---VMETCFYMQFPKVVVETLVAIVDSNGITVK--  
NSKSKHKKRKHKKR-LTPEIEKIFWEHRLMSKFDIDW--DKLPP--FSIVMFAEN-PVTDNRNSVVTIIRLGRDYP-----LQRV---N--SKE-----  
FVFAKAGPNDN-----AALGTFMTRLLTDFRA--HKRTGFG--  
>BATDRAFT\_28684 -----AALGTFMTRLLTDFRA--HKRTGFG--  
EYKIGSSDADVTIP-GTITGIDLPIAVEKQSPDLVGINPEF-DGVFGFAYSS-LS--KHH--PPIT-----VLD-SL-YK--DGVIPNEIQLCPYDM-----SGEPV---TIEY-KGE--  
LHESFINIGNTDITAK-----CG-TDGTSLIWIWESPT-----DRHTVNIKNILV--NDEPVNL-----PERFQKV-ENGRGLTLYS---YIHTCFYMRFPPEAVSTLVNAILDSGAIIVK--  
NN-----MLERRH-LTPEIDIDIFWKHLMIRSNRIDW--DKLPS--LTIWVSET-PVTDNRNSVVAIKLGPKEY-----IQII---D---SKH-----  
VMFSVVEGSPDN-----AILGTFMTRLLTDFRA--HTRIGFG--  
>BATDRAFT\_26132 -----AILGTFMTRLLTDFRA--HTRIGFG--  
DYNAFSSDAAVTIP-GTITGIDLPIAVEKQSPDLVGINPKF-DGVFGFHPSS-LS--EHH--SPIT-----AMD-VL--YN--GGVISNNEVSLQLCSHDI-----SGEPI---TINY-RGN--  
FQSFVNIENGTDITPK-----CG-TDGRSAVWVQSPS-----NDCHNVNIKSILV--NGEQANL-----PAEFQKKV-EDDHTLYS---YIQTCSYMIFFPVTVTALVGAIVDSGAIIVK--  
NN-----L--FTSK-LSKREIKKIFWRSYAMPESTYNIW--NKLPS--LSITMHAET-PVTLNENSVVTIIRLGPKEY-----IQRV---N--SER-----  
FLFAVAVGSNDR-----AALGTFMTRLLTDFRA--HKRIGFG--  
>BATDRAFT\_27290 -----AALGTFMTRLLTDFRA--HKRIGFG--  
EYKIGSSDAAVTIP-GTRITDINLPIAVEKQSPDVGINPEF-DGVFGFAYSS-LS--KHH--PPIT-----VLD-SL-YK--DGVIPNEIQLCPYDM-----SGEPV---TIDY-KGD--  
LHESFINIGNTDITAK-----CG-TDGTSLIWIWESPT-----DRHTVNIKNILV--NDEPVNL-----PERFQKV-ENGRGLTLYS---YIHTCFYMRFPPEAVSTLVNAILDSGAIIVK--  
IN-----I--FSDK-LGKVMVKKIFSQNYAMLES-----DDQFTVNIKSILV--NDEPVNL-----PEEFQKTIMENGRILYS---SVETCFYMRFPPEAVSTLVNAILDSGAIIVK--  
VFAIKAGPNDN-----AILGTFMTRLLTDFRA--HKRIGFG--  
>BATDRAFT\_27296 -----AILGTFMTRLLTDFRA--HKRIGFG--  
EYRIGSSDAAVTIP-GTRITGIDLPIAVEKQSPDLVGINPKF-DGVFGFAYSS-LS--NHH--SRVT-----AID-AL--YN--GGVIPKNEVSIQLCPYDM-----SSGKPV---TIKY-KGN--  
LSKSSINIGSDTVPK-----CG-TDGRSAVWVQSPS-----DDQFTVNIKNILV--NGKQVQL-----PEEFQKNGKNGRILYS---YIHTCFYMRFPPEAVSTLVNAILDSGAIIVK--  
KT-----KSEHKH-LSETEIEKVFENRLLKSKLNINW--GRLPS--LITMFAEN-PVTDNRNSVVTIIRLGRDYP-----LQRV---N--SKE-----  
SRFTVAGSNDK-----AVLGFPMNRLTDFRT--HKRIGFG--  
>BATDRAFT\_87250 -----AVLGFPMNRLTDFRT--HKRIGFG--  
EYNGTSTADVTIP-GTRITDINLPIAVEKQSPDLVGINPEF-DGVFGFYPL-LS--KHH--SRIT-----AMD-IL--YS--NNVIPNEIQLCPYDM-----SGEPV---TIKY-KGD--  
TSDSFINIGNTDITAK-----CG-TDGRSAVWVQSPS-----DDQFTVNIKNILV--NGKQVQL-----PEEFQKV-ENGRGLTLYS---YIHTCFYMRFPPEAVSTLVNAILDSGAIIVK--  
SM-----FSK-LSKREIENIFWENHPMIESTYNIW--EKLST--ITITVFSQT-PVTDNRNSVVTIIRLGRDYP-----IQRV---D---SED-----  
CKFAIKAGSNDK-----AILGTFMTRLLTDFRA--HKRIGFG--  
>BATDRAFT\_22611 -----AILGTFMTRLLTDFRA--HKRIGFG--  
EYKIGSSDAAVTIP-GTITDINLPIAVEKQSPDLVGINPEF-DGVFGFNSL-LS--KHH--PQIT-----AMD-VL--YT--SDVIPNEIQLCPYDM-----SGEPV---TIDY-KGD--  
LSDSFINIGNTDVTAK-----CG-TDGTSAVWVQSPS-----NDEFTVNIKSILV--NDEPVNL-----PEEFQKTIMENGRILYS---SVETCFYMRFPPEAVSTLVNAILDSGAIIVK--  
IN-----I--FSDK-LGKVMVKKIFSQNYAMLESFSDW--GKLP--LSITMFAEN-PVTDANLNSVVTIIRLGPKEY-----IQRV---D---SEN-----  
CYLTIAGPNDN-----AILGTFMTRLLTDFRT--HKRIGFG--  
>BATDRAFT\_28256 -----AILGTFMTRLLTDFRT--HKRIGFG--  
EYKIGSSDAAVTIP-GTIIIGMDLPIAVEKQSPDLVGINPKF-DGVFGFAYSS-LS--DQH--PQST-----AMD-VL--YN--SGIIPKNEIQLCPYDM-----TLNEEGI---MIEY-KGE--  
LSEFINIGNTDITPK-----CG-TDGRSAVWVQSPS-----ADHHTVNIKSILV--NGKQVQL-----PAGFQKV-ENGRGLTLYS---YIHTCFYMRFPKVVVETLINTLSDAITVK--  
TM-----FRNDHLGKRRIKRLKRNHLMSEKYNINW--DMPT--ISIVMSET-PVTDNRNSVVTIIRLGRDYP-----MWRY---D---SKH-----  
VRFVAVGSNDY-----ATLGTSMTRLLTDFLQ--NTRIGFG--  
>BATDRAFT\_24293 -----ATLGTSMTRLLTDFLQ--NTRIGFG--  
QYNGTSTADVTIP-GTITGVNLPVAVEKQSPDLVGINPKF-DGIFGLAYSS-LS--NQH--SRVT-----AMD-AL--YN--DGAIPKNEVSIQLCPYDM-----SGEPV---SIKY-KGK--  
TSEFINIGNTDVTAK-----CE-TDGTSAVWVQSPS-----NNQFSVNIKSILV--NGRPAEL-----PAEFQKV-KDGRGLTLYS---SVETCFYMRFPPEAVSTLVNAILDSNAITVK--  
DN-----M--LRSYDLKDKKIMRLWKNHLMRYKYIDW--SRMPR--FSITMFAQT-PVTDNRNSVVTIIRLGRDYP-----MQIISIEN--SEK-----  
FLFAVTVGSNDY-----AVLGVSMTRLLKTFDLQ--NARIGFG--  
>BATDRAFT\_21660 -----AVLGVSMTRLLKTFDLQ--NARIGFG--  
AWEHGFLATYQI-KTSIIVKNAPVIGFQSDPSIDIGNEQIQLGLAYPS-LA--EY-ATPPT-----VMD-AL--YD--SKAISNNEVGLHLCPYEL-----GPSLTYMHETSJ---FGYDGVY--  
SKKSYIDIGNLAPK-----CG-TNGNPIWISYPT-----QDYFTVDIKSILV--NGNVPVL-----PNEFQKVTGDKMHPFS---  
IDTCTTMDLPEHVAILDEIVGSDAFEPK-----LDHHTLFFWERYIINKSHYTIW--KKLPV--LSFVMSGV--SNSSDSIVKTLGPKDY-----IQKI---S---  
STK-----YLFVSVAGSNKN-----AVLGTSMTRLLKTFDLQ--HVRIGLQ--  
>BATDRAFT\_4465 -----AVLGTSMTRLLKTFDLQ--HVRIGLQ--  
AVNYTLGNDALTI6-TVSPQNVFAIPTSVTMPPSPVGT-----DGIIGLAPPS-FN--NQG--TDQ-----FMQ-WL-----SYSAVAVQVSVHDMVK--  
EQDNRSDNGTITYGIEPGRS-----SGTPHWLPIQL--TNIPGSSNYVWNMDSITF--GGGAIPM-----PLDASMA-----GKAFTLTSSQYQY-----TD---  
LVDGTALQLVQQFLDVVNQMGIDNGAGQ-----YTLDC--TKAKA--FPNLVLTG-----GKAFTLTSSQYQY-----TD---  
GKI-----CVSILGRAQDQER-----TILGVAFRLQYVTFDYD--RWAVGI--  
>BATDRAFT\_23205 -----TILGVAFRLQYVTFDYD--RWAVGI--  
EYKIGSSDADVTIP-GTITDINLPIAVEKQSPDLVGINPEF-DGVFGFAYSS-LS--NHH--PPAT-----AMD-AL--YN--HDVIPNEIQLCPYDM-----SGEPV---TIDY-KGE--  
TNSFINIGNTDITAK-----CG-TDGTSAVWVQSPS-----DDQFTVNIKSILV--NDEQVQL-----PEEFQKTIMENGRILYS---SVETCFYMRFPPEAVSTLVNAILDSGAIIVK--  
IN-----I--FSDK-LGKVMVKKIFSQNYAMLESFSDW--GKLP--LSITMFAQT-PVTDANCSVVTIIRLGPKEY-----IQRV---G---SKN-----  
FAFAIKAGPNDN-----AILGTFMTRLLTDFRA--HTRIGFG--  
>BATDRAFT\_22593 -----AILGTFMTRLLTDFRA--HTRIGFG--  
EYKIGSSDAAVTIP-GTITGVNLPVAVEKQSPDLVGINPKF-DGVFGIHFSS-LS--KHH--SPIT-----AMD-SL--YS--NNVIPNEIQLCPYDM-----SGEPV---NIKY-KDK--  
FEQSFINIGNTDITAK-----CG-TDGRSAVWVQSPS-----NDHHTVNIKSILV--NDEQVQL-----PEEFQKV-EDDHTLYS---HVETCSYMHFPQTVVIALVKAIVDSNAITW--  
DA-----KSRRLNPEEIDIFWKHRLMSESNFIDW--RKLPT--FTIVMYAQT-PVTDNRNSVVTIIRLGPKEY-----IQKV---NLGKFKR-----  
YLFVAVGSNDN-----AILGTFMTRLLTDFLQ--NTRIGFG--  
>BATDRAFT\_25680 -----AILGTFMTRLLTDFLQ--NTRIGFG--  
EYNGTSTADVTIP-GTITDINLPIAVEKQSPDLVGINPKF-DGVFGFAYPL-LS--NQH--PQVT-----AMD-AL--YN--GGAIPNEVSIQLCPYDM-----SGEPV---TIKY-KGE--  
LHESFINIGNTDITPK-----CG-TDGRSAVWVQSPS-----NNQFSINIK-----ILPEKLVATLINTLSDNAITVK--  
NI-----LLRRKDKKVKKLLQANSMPFKYNYNIKW--EKLPT--VSIVMFAQT-PVTDNRNSVVTIIRLGPKEY-----MVKY---D---SEK-----  
FRFSIKAGSNDK-----AALDIPMSQLAVTFDRT--HKRIGFG--  
>BATDRAFT\_23274 -----AALDIPMSQLAVTFDRT--HKRIGFG--  
EYRIGSSDAAVTIP-GTRITGIDLPIAVEKQSPDLVGINPKF-DGVFGFAYSS-LS--NHH--SRVT-----AID-AL--YN--GGVIPKNEVSIQLCPYDM-----SSGKPV---TIKY-KGN--  
LSKSSINIGSDTVPK-----CG-TNGKSIANWQSPS-----DDQFTVNIKSILV--NGKQVQL-----PEEFQKNGKNGRILYS---YIHTCFYMRFPPEAVSTLVNAILDSGAIIVK--  
KT-----KSEHKR-LSETEIEKVFENRLLKSKLNINW--GRLPS--LITMFAEN-PVTDNRNSVVTIIRLGPKEY-----LHKY---D---SKH-----  
ARFTVKSNDK-----AVLGFPMTRLLTDFRT--HKRIGFG--  
>BATDRAFT\_89380 -----AVLGFPMTRLLTDFRT--HKRIGFG--  
SAKGHGFLTYSIP-ETTISIKSAPVVGISEQENPVIIIDGNPNQGVFSFAYPS-IA--MYH-AKPTT-----IMD-AI--YE--SGAVPNEVAMELCPYGL-----YPEHADAV---TLKYDGA--  
SEKSYIDIGNTEIDPK-----CD-TDGPVIVWQSPS-----RDRFTVNIKEIRI--DNKARRL-----PSEFQKVEDIWHPPYS---  
FISTCSKYISLPRKIYDKLIRAIKSGAFKPK-----LTKDDIKFFKKQIKVPHDIIDW--KKLPK--LSFVMTYET--SKTGKASRSSVEITLGRDYP-----IQVY---G---

AEE-----YQFFVDVGRNKR-----VVLGTFPMLRMRVVDRT--NQRIGFG--  
>BATDEDRRAFT\_21133  
DYVGVIPYVAVTIP-GTRITDTSPLIPLAVKLSADSVGGTGLKQGFYGFYTS-LS--NHH--SKTT-----AMD-IL-YN--NDVIPNNEVSLQLCPYDM-----SNGQPI----TIKY-KYS-  
TSESFINGINTDVAAK-----CG-TNGKSIWVWSPS-----DDRHTVNIKSILV--NDKQVLD-----PEEFQKRM-ENGRILYS----TVETCFLYMFPFETIVKALVDAIADSDAITVK--  
YN-----YVRIDFLNRQDFNDIFWRHHLMPAEMFIKW--NKLPT--LTIIMFAET-PVTDNDRSDIVTIKLGPRDY-----IQKV--D--FKN-----  
LVFAVKADSNH-----AVLGASFMSRLGLTFDRQ--NARIGFG--  
>BATDEDRRAFT\_25355  
EYRGSSTAVVTIP-GTRITGINLPVLVEKQSPDLVGINPKF-DGVFGFYGS-LS--SHY--TSVT-----AMD-AL-YS--YGVIPNNEISQLCPYDM-----SGEPV----AINY-KGE-  
LQDSFINIGNTDVTAK-----CG-TDGKSVAVWNSPI-----ADQFTVNIKSILV--NGKVNVL-----PAEFQQVV-ENG-----LVTMLIDAILDSGAIITVK--  
NT-----M--LSDNYLDRKRIRKRLKENRMLSESTYINW--DKMPT--ISITMHAET-PVTVNDSNVVITIELGPRDY-----MQRI--D--SKY-----  
VVFVAVKVPNYK-----ATLGISFMTRLGLVFDK--HARIGFG--  
>BATDEDRRAFT\_27069  
EYKGISSKAVVTIP-GTRITDTSPLIPLAVKQSPDLVGINPKF-DGVFGFYGS-LS--KHH--PPAT-----AMD-IL-YN--GNTIPNNEVGLQLCPYDM-----SGDPV----TIKY-KGD-  
ISNSFINIGNTDITAK-----CG-TNGRSVAVWVSDPS-----DGYFSVNIKSILV--NGEQVDL-----PAEFQKRLKNGYALYS---RVETCFMFMQFPERVATLIDVIVGSNAIIFK--  
KK-----K--LSDK-LNKEMVKKRLKRNRFIFKSNYINW--SKLPT--VSIVMFSQ--PVTDNDRNSVVIKLGPKDY-----IQII--D--SKH-----  
VRFTVKVGSDDH-----AILGIFMTRLGLTFDRA--HKRIGFAP--  
>BATDEDRRAFT\_27767  
EYKGVTSADVVTIP-GTRITGINLPVIAVEKQSPDLVGINPKF-DGIFGFAYSS-LS--KQH--SQIT-----AMD-SL-YN--DDVIPNNEVSLQLCPYDI-----SGEPV----AINY-KGK-  
LHESFINIGNTDITPK-----CG-TDGKSVAVWQSPS-----NSYFSVNIKNILV--NDEPVNL-----PAEFQKRRKNGRTLYS----VVETCFLYMRFPKVVVETLVDAILDSNAITIN--  
NN-----M--LERR--LNDKEIEDIFWKHYLMSEKYFRTG--DKLPT--LSIVMFAEN-PVTDNDRNSVVEIKLGPRDY-----MQRV--G--FEK-----  
FAFVAVKAGSNH-----AVLGVSFMTRLGLTFDRK--HKRTGFG--  
>BATDEDRRAFT\_27286  
EYNGVTSADVVTIP-GTRITDIDLPIVIAV-----GIDSML-NGVFGFNSL-LS--NHH--PQTT-----AMD-AL-YN--GGIIPNNEVSLQLCPYEM-----SGEPV----TIDY-KGE-  
TSNSFINIGNTDVTAK-----CG-TDGKSVAVWQSPS-----DDQFTVNIKSILV--NDEPVNL-----PEEFQKIMENGRILYS-----  
PEEFQKIMENGRILYS-----  
>BATDEDRRAFT\_26748  
EYNGFSSTAVVTIP-GTRIAGINLPVIAVEKQSPDVSIGSSKF-DGIFGLGYPS-LS--NHH--PPAT-----AMD-AL-YT--NDVIPNNEIGLQLCPYEM-----SGEPV----TIDY-KGD-  
TSNSFINIGNTDVTAK-----CG-TDGKSVAVWNSPS-----DNQFSVNIKSILV--NDEPVLD-----PEEFQKVV-ENGRILYS----SVETCFLYMRFPPEAVEALVDAILDSGAIITV--  
IN-----I--FSDK-LGKVMVKKIFSONYAMLESQDFIDW--GKLP--LTIIMFAEQ--PVTDANCNSVVIKLGPKDY-----IQRA--G--SKN-----  
CKFAIKAGSNH-----AVLGIPFMAQLGLTFDLQ--NKRIGFG--  
>BATDEDRRAFT\_90861  
SISCEEQLDVVHLA-GTLVSES-----ICSNMITNAVNTQDML-GGLVGMSPPL-----GK--DNTN-----LML-TL-----EQSFLSMVSWFYNQMAV--  
EGDHLISGAGEITFGGYNPARF-----SGDIEWLVPIV-----NTGYWSVKLDGMTF--GDMIVPV-----RKESSQT-----IFDGTTLIALPSDMF--  
TYMNTIYAEIDPVG--GM-----YKLDK--KHATT--LPP-----VTLFFGGPKY-----MMTWSEQLTDNVD-----  
CWSVFTPLNMG-----IIFGVSFLRNYHVTFDYTSMLMQVLA--  
>BATDEDRRAFT\_24767  
QYKGVTSADVVTIP-GTRITDIKLPVIAVEKQSPDLVGINPEF-DGIFGFNSL-LS--NHH--SRIT-----AMD-VL-YN--DGVIPNNEVSLQLCPYEM-----NGEPV----TIDY-RGK-  
TSNSFINIGNTDITPK-----CG-TNGRSVAVWVSDPS-----DGRHTVNIKSILV--NDKPVNL-----PEEFQKRV-KDGRILYS----VIQTCFIRYRFPVVKVKAIDAILDSGAIITVK--  
KA-----M--YSNK-LNSEEIKRIFWEHYAMLESKLNIDW--GKLP--LTIIMFAEQ--PVTDNDRNSVVIKLGPKDY-----IQRY--D--SER-----  
FLFIVAAGSNH-----AALGIPFMTLGLTFDRA--HKRIGFG--  
>BATDEDRRAFT\_28181  
QYNGVTSADVVTIP-GTSITDIKLPVIAVEKQSPDLVGINPEF-DGIFGFNSL-LS--DHH--PPIT-----AMD-VL-YK--DGIIPNNEIGLQLCPYDI-----SGEPV----SIKY-KGK-  
LHESFINIGNTDITPK-----CG-TDGKSVAVWVSDPT-----NNQFSVNIK-----ILPEKVTTLINAILDSNAITVK--  
GS-----M--LRRK-LGKEEIKKLLQANSMLFKSNYNIKW--  
DRM-----  
>BATDEDRRAFT\_24760  
EYSGFSSTAVVTIP-GTITGVNLPVIAVEKQSPDLVGINPKF-DGVFGFYGS-LS--KHH--PPAT-----AMD-TL-YN--DGVIPNNEVSLQLCPYDM-----NGEPV----TIKY-RGK-  
TSNSFINIGNTDITPK-----CG-TNGRSVAVWVSDPT-----DGRHTVNIKSILV--NDEPVNL-----PEEFQKVV-ENGRILYS----VIQTCFIRYRFPVVKVKAIDAILDSGAIITVK--  
KT-----V--FSNK-LNKKEVKKRIFWEHYAMLESQDFIDW--GKLP--LTIIMFAEQ--PVTDNDRNSVVIKLGPRDY-----IQKI--D--YTR-----  
LVFAVTTGSNDK-----AVLGIPFMTLGLTFDQ--NKRIGL--  
>BATDEDRRAFT\_12639  
QYGRIALGTPPQSFVQF--DTGSANLWLPSTRCDPACVKHSQFNR-----LLSSTWSTLQTF----SIQYGTGS--  
LSGVMSTGGTYMA-GLTVNQS--FAESVSGPTFTINTKY-DGVLGLGMRE-IS--IN--NVAT-----PME-NM-HA--QGLIPAGVFGLYLTKNSA--  
PGSVLITGGYDPSHV-----DGSITWLPLSK-----RQFVQVGLTSVTF--NGTLLIQ-----NAQA-----VFDSTGLIAIP--  
TVSATLHQQLGAIPYQNG-----WILGDSFMKLYYTFDSD--NNRIGIAN--LQLIPC--TGLPS-----VTFMLN-----NVSFTLRNEDY-----VIPF--G--FGY-----  
CVSAFVGLDMHG-F-----  
>BATDEDRRAFT\_89821  
DCKGVSSEAAVTIP-GTRITGVNLPVIAVEKQSPDLVGINPKF-DGVFGFYGS-LS--NHH--TSST-----AID-VL-YS--KNVIPNNEVGLQLCPYEM-----EKPV----SINY-KGN-  
SQESFINIGNTDITPK-----CG-TDGRSVAVWVSDPS-----DDHFAINIKOILV--NDKPVNL-----PAEFQKIMENGRILYS----VVETCSAYMFPKVVVAALVAILDSGAIITVK--  
NT-----M--FRSK-LDKDEIQGIFWGNLMPLEFNFINW--DMMPT--ISVAMFAEN-PVTDNDRNSVVIKLGPKDY-----MQIV--D--SKY-----  
VVFVAVKAGSNH-----ANLGIPTMTRLGLTFDRK--HKRIGL--  
>BATDEDRRAFT\_27037  
AVTCNVGQDILSIG-GLSIPNQ--LCLANSITS--NTPHL-DGIIGLAPPS-----VM--EPTS-----VFS-ML-DT--NKFAAASQVSWFYNSSSL--  
VDGHVQSGVVTVGGVDPISL--KGIIRWFAPML-----ANGRHSWPLTITLDRGSKVPT-----YAFDC--NAVPN--LSPILLTA-----GVDIKIMPEEQ-----  
QKDLSPILLIDSYSTYFLPRFMPDPLNAIHFQAKIDGT--GT-----YAFDC--NAVPN--LSPILLTA-----GVDIKIMPEEQ-----  
YKFK-----RQY-----CIIFFTSDRPNST-----PLLGVGFMFRYVTFDHK--KFKIGFST--  
>BATDEDRRAFT\_26151  
EYRGSSTAVVTIP-GTITGIGLPPVIAVEKQSPDLVGINPKF-DGVFGFYGS-LS--KRR--POIT-----VLD-SL-YN--GGIIPNNEIGLQLCPYGM-----GRHV----TIDY-KGK-  
TSNSFINIGNTDVTAK-----CG-TDGKSVAVWNSPT-----DRHTVNIKSILV--NDEPVNL-----PEEFQQVV-ENGRILYS----YIHTCFVYMRFPVVKVVAALVAILDSGAIITVK--  
NS-----MLKRLKSPEDIDNIFWKHYMPKSSFNIEW--NKLPS--LTIIMYSET-PVTDNDRNSVVIKLGPKDY-----LQRI--D--SKN-----  
YLFVSVVGPNDN-----AILGIPFMTLGLTFDQ--NARIGFG--  
>BATDEDRRAFT\_90978  
EYSGFSSTAVVTIP-DTGITGILPVLAVKQSPDLVGINPKF-DGVFGFYGS-LS--KHH--PPAS-----AMD-VL-YS--NDVIPNNEVSLQLCPYDM-----SGEPV----TIKY-KGE-  
LQDSFINIGNTDITPK-----CG-TDGKSVAVWVSDPT-----NDQFTVNIKSILV--NGEKVEL-----PAEFQKVV-ENGRILYS----RVETCFLYMRFPKVVVATLVAIVGSGAIITVK--  
NK-----VLKRKHL--LSPEDIDNIFWKHMLMIRSDFKIKW--EKLPS--LTIIMHAKN-PVTDNDRNSVVIKLGPKDY-----IQII--D--SKH-----  
DLFVSTAGSNH-----ATLGIPFMTLGLTFDQ--NTRIGFG--  
>BATDEDRRAFT\_25784  
EYRGISSDAVTIP-GTITGINLPVLSAEKQSPDLVGIHPKF-DGVFGFYGS-LS--KHH--PPAT-----AID-AL-YK--DGVIPNNEIGLQLCPYEM-----NGQP--TIKY-KNE-  
LQESFINIGNTDVAAK-----CG-TNGKSIWVWQSPS-----DGYFSVNIKSILV--NGKQVDL-----PEEFQQVV-ENGRILYS----YLHTCFYIRFPKTVVDVLINAILDNNAITTK--  
SI-----LFRNKLGMKIKSSLNKNNYLMFQSDYINIDL--DKLPT--LSIVMFAEQ--PVTDNDRNSVVIKLGPRDY-----MQRV--D--SKN-----  
VFTVEAGPNDN-----AVLGASFMTLGLTFDQ--NIRIGFG--  
>BATDEDRRAFT\_20117  
VTGVISSDTLQFA-GNIPNQ--FAEAVTEPNTLTSF-DGVLGLGFTA-IS--INN--IPTP-----MD-NM-IA--RGLIPAGIFGFLTRGGV-----TRSTFTPNNSPF-----AIQYGLGS--  
SGSSLTGGIDTHV-----NG-AITWIPVVR-----KAYEVVMDSVTL--GKTLTAT-----GSHA-----VFDSTGLIAIP--TVHANHQQLGAIPF-----  
TN-----GLQIPC--SGLPP-----ITFALN-----G-VAFTLRNEDY-----VLPF--G--FGY-----CVSVFVGLDMNN--  
F-----WILGDSFLKFYTFDQ--NVRIGIAN--  
>BATDEDRRAFT\_28541  
EYRGISSDAVTIP-GTITGINLPVIAVEKQSPDLVGINPKF-DGVFGFYGS-LS--KHH--PPTT-----VLD-TL-YS--NNVIPNNEIGLQLCPYGM-----NGEPV----IIDY-RGK-  
RSKSFINGNTDITAK-----CG-TDGRSVAVWNSPT-----NDHHTVNIKSILV--NDEPVLD-----PEEFQQVV-KDDHTLYS----VVETCSYMYFPKVVVATLVAIVGSGAIITVK--  
KN-----IFKDERK-LTPEEIDNIFWKHYLMVRSNFHIDW--IKLPT--FTIIMYQ--PVTDNDRNSVVIKLGPKDY-----IQRV--D--YTH-----  
NMFVAVKAGSNH-----AILGIPFMTLGLTFDQ--NIRIGFG--  
>BATDEDRRAFT\_28166  
KYSGISSTADVVTIP-GTITDINLPVIAV-----GIDPMF-NGVFGFYGL-LS--NHH--SRIT-----AMD-AL-YN--GGIIPNNEVSLQLCPYEM-----SGEPV----TIDY-KGK-  
LSDSFINGNTDITPK-----CG-TDGKSVAVWNSPS-----DDQFTVNIKSILV--NDKRVNL-----PAGFQKRV-KDGRILYS----VVETCCTMHFPKVVVATLVAIVGSGAIITVK--  
NN-----M--FRRK-FQORDINLFWKHMLMVEPKLNIDW--SKLPT--LSIVMFAEQ--PVTDNDRNSVVIKLGPRDY-----MQKI--D--SER-----  
YLFVAVVGSNYN-----AALCIPFMTLGLTFDRA--HKRVGF--  
>BATDEDRRAFT\_89831  
-----NGEPV----TIDY-KGD-

EYSGVSSDAVVITP-GTRITDIDLPLVAVKQSPDLVGDPEF-DGIFGFGNSL-LS--NHH--SRIT-----AMD-AL-YN--GGIIPNEVSLQLCPYEM-----  
TSNFINIGNTDVTAK-----CG-TDGRSVAVWVDSPP-----DGRHTVNIKSILV--NDKPVNL-----PEEFQKRV-KDGRTLYS---VIQTCFRIYRFPVVKALIDAILDSGAIATV-KA-----M--YSNK-LNSEEIKRIFWEHYAMLESKLNIDW--GKLP--L-SITMFAQN-PVTDANCSVVITKLGPKDY-----IQRV---D--SKH-----  
VLFAVKAGPNDN-----VILGIPFMTLRLGTFDRA--HKRIGFG--  
>BATEDRAFT\_90267-----GQPV---TINY-KGD-  
EYNGISSTAVTIP-GTRITGIDLPLVAVKQSPDLVGINPKF-DGVFGFGHPS-LS--KHH--SPIT-----AIN-VL-YN--DGVISKNEVGLQLCPYEM-----  
LSDSFINIGNTDITEK-----CG-TDGRSVAVWVDSPP-----NSYTVNIKSILV--NGEKVDL-----PAEFQKRV-EHGRTLYS---SLETCTYMHFPETVVAALISAILDNGAITVK--SN-----L--FDDQ-LSKEEIEKIFLKHLMPTSNYNIKW--DRMPT--L-SITMHAET-PVTVENRNSVVITKLGPRSY-----MQRV---D--SKR-----  
FEFAIEVGSNDY-----AALGIPFMTLRLGTFDRA--HKRIGFG--  
>BATEDRAFT\_28328-----SGEPV---TIKY-KGK-  
EYNGVSTAVTIP-GTSITDINLPLVAVKQSPDLVGINPKF-DGVFGFGHPS-LS--NHH--SQT-----AMD-TL-YS--NNVIPRNEISIQLCYEM-----  
LSDSFINIGNTDITEK-----CG-TDGRSVAVWVDSPP-----NSYTVNIKSILV--NGEKVDL-----PAEFQKRV-KDGRTLYS---SVETCFLHMRFPKAVKALIDAINSDGAIATV-KA-----M--YSNK-LNSEEIEKIFLKHLMPTSNYNIKW--DRMPT--L-SITMHAET-PVTVENRNSVVITKLGPRSY-----MQRV---D--SKR-----  
FEFAIEVGSNDY-----AALGIPFMTLRLGTFDRA--HKRIGFG--  
>BATEDRAFT\_90524-----SGEPV---SIKY-KGD-  
EYNGVSTAVTIP-GTSITDINLPLVAVKQSPDLVGINPKF-DGVFGFGHPS-LS--NHH--SRIT-----AMD-AL-YN--DGAIPKNEVSLQLCPYEM-----  
LHESFINIGNTDITEK-----CG-TDGRSVAVWVDSPP-----NSYTVNIKSILV--NGEKVDL-----PAEFQKRV-KDGRTLYS---YQTCFLCIVLPEKVVTLLINAILDSNAITVK--GS-----MLRRKLKKEKVKKLLQANSLMFKSNYNIKW--DRMPT--L-SITMHAET-PVTVENRNSVVITKLGPRSY-----MQRV---D--SKR-----  
FRFTVAGSNDY-----AVLGSFMTLRLGTFDRA--HKRIGFG--  
>BATEDRAFT\_28176-----SGKPV---TIRY-KSR-  
KYKGFSDTAVTIP-GTRITGIDLPLVAVKQSPDLVGINPKF-DGVFGFGHPS-LS--DHH--SRVT-----AID-AL-YN--GGVITNNEVGLQLCPYEM-----  
LSDSFINIGNTDITEK-----CG-TDGRSVAVWVDSPP-----NSYTVNIKSILV--NGEKVDL-----PAEFQKRV-KDGRTLYS---YQTCFLCIVLPEKVVTLLINAILDSNAITVK--GS-----MLRRKLKKEKVKKLLQANSLMFKSNYNIKW--DRMPT--L-SITMHAET-PVTVENRNSVVITKLGPRSY-----MQRV---D--SKR-----  
FRFTVAGSNDY-----AVLGSFMTLRLGTFDRA--HKRIGFG--  
>BATEDRAFT\_23192-----GQPV---TIKY-KGK-  
EYNGVSTAVTIP-GTSITDINLPLVAVKQSPDLVGINPKF-DGVFGFGHPS-LS--DYY--PPVT-----AMD-VL-YN--GGFISNNEVGLQLCPYEM-----  
LQESFINIGNTDITEK-----CG-TDGRSVAVWVDSPP-----NSYTVNIKSILV--NGEKVDL-----PAEFQKRV-KDGRTLYS---YQTCFLCIVLPEKVVTLLINAILDSNAITVK--GS-----MLRRKLKKEKVKKLLQANSLMFKSNYNIKW--DRMPT--L-SITMHAET-PVTVENRNSVVITKLGPRSY-----MQRV---D--SKR-----  
FRFTVAGSNDY-----AVLGSFMTLRLGTFDRA--HKRIGFG--  
>BATEDRAFT\_90888-----FMTINVT-----  
PVTL--NQIDTGSSTFWIVSTLNCAGNGCTPAVATANAF-----NPTK-----RSVINIPRVSFYDQSVN-SLEATQPIASSGEITFGTPNPARY-----  
TGNFTWLTIP-----NMQSVAWVDSPP-----DQFTVNIKSILV--NGEKVDL-----PAEFQKRV-KDGRTLYS---YQTCFLCIVLPEKVVTLLINAILDSNAITVK--GS-----MLRRKLKKEKVKKLLQANSLMFKSNYNIKW--DRMPT--L-SITMHAET-PVTVENRNSVVITKLGPRSY-----MQRV---D--SKR-----  
LFDGTTLIYLDQQLFPFINTAMGGISKQGGI-----YELDC--SLVHT--LQPIITFSLG-----GIGARLTLWN-----MQYFTLDN-----  
TR-----CISIFTSPPQS-----NIFGGIFLQHFYTSFDYN--ESRIGLAA-----  
>BATEDRAFT\_28984-----PTINTPRPPGSD--LIGTYGDQS-  
GWTGYGFGTARVT-GTNITASNAPVIGMFRQTNPIYTGDTVGLLGIAYPS-LA--SYR-VTPST-----VVD-AW-VA--SGTMPKNEIAFHACPYSM-----  
TNQSYVDFGNDPDSYK-----CS-SNGVPVWVAYSAP-----RTYFIDVRAISI--DSVPVTL-----PQTFQNGI-----GYNKWS-----  
LVDSCTSVMILPGSVITLVAIQQSGLPSD-----LASSPHLNFSLGSGIRPVQPFQW--SKLPS--ISFDITSQ--IRPGGQATFKITLGRQY-----IQPN---A---  
NGY-----FAMIARSGGERY-----ANLGIPLFNLNVLDRA--NARVGSQ--  
>BATEDRAFT\_28688-----SGEPV---TIDY-KGD-  
EYSGVSSNAVVITP-GTSITDINLPLVAVKQSPDLVGINPKL-DGVFGFGHPS-LS--KHH--PQT-----AMD-VL-YN--GGVIPNNEIGLQLCPYEM-----  
TSNFINIGNTDVTAK-----CG-TDGRSVAVWVDSPP-----DQFTVNIKSILV--NGEKVDL-----PAEFQKRV-KDGRTLYS---SVETCFLHMRFPVVDVLAIDLSGAIATV--IN-----I--FSDK-LGKVMKKIFSONYAMLESFSDIDW--GKLP--L-SITMFAQN-PVTDANRNSVVITKLGPKDY-----IQRV---D--SKH-----  
SKNKYLLTVCIRFAIKAGSNDK-----AVLGSFMTLRLGTFDRA--HKRIGFG--  
>BATEDRAFT\_92488-----KRGEV---SGSYGSGA-  
TKWGYGFLATVNP-DTGIIATNSPTVIGYQSIPTVIGSEPRQVGFAYPS-LS--YH-TSPES-----VMD-AW-YK--SKTILKNQVATQLCPYGL-----  
SEKSYIDIGNTDSTAK-----CG-TDGRSVAVWVDSPP-----DQFTVNIKSILV--NGEKVDL-----PAEFQKRV-KDGRTLYS---SVETCFLHMRFPVVDVLAIDLSGAIATV--IN-----I--FSDK-LGKVMKKIFSONYAMLESFSDIDW--GKLP--L-SITMFAQN-PVTDANRNSVVITKLGPKDY-----IQRV---D--SKH-----  
YDTCRSIRLPHLVDLGLGAIATRAFQPP-----LTMETLAFWQRDIDTLKYIWDW--KCLPT--LSFLVDLTV--PKKKKGSYSTVKITLGPCKY-----LQI---G---  
PNQ-----YFSGVGFSETS-----ITLGIPTLRLKVVFDRE--GGRIGFG--  
>BATEDRAFT\_35816-----TSHTAKTINNTL---NRDYGDT-  
SVKCLVSDTLVIA-GVAIPNQS--ICSAIATNSPTVIGYQSIPTVIGSEPRQVGFAYPS-LS--YH-TSPES-----VMD-AW-YK--SKTILKNQVATQLCPYGL-----  
KNVFPQNKVYFNRRVNSLESNTGLVPNAGEITFGAPDNRF-----TGNFKMNPITV-----TESHWAVAFDSVTI--NGRTTSA-----SKISA-----  
LFDGTSLIYLNQPIFNAVNSAMGGKIRNSD-----TYQVDC--TKVKS--FPVPTFTN-----GNSFTLNDQD-----VIVL---Q---  
GQT-----CISLFSASGDL-----TIFGASFLRQFYTSFDYT--LGVGL-----  
>BATEDRAFT\_92765-----SGEPV---TIDY-KGD-  
EYNGVSSNAVVITP-GTSITDINLPLVAVKQSPDLVGINPKL-DGVFGFGHPS-LS--KHH--PQT-----AMD-VL-YN--GGVIPNNEIGLQLCPYEM-----  
TSNFINIGNTDVTAK-----CG-TDGRSVAVWVDSPP-----DQFTVNIKSILV--NGEKVDL-----PAEFQKRV-KDGRTLYS---SVETCFLHMRFPVVDVLAIDLSGAIATV--IN-----I--FSDK-LGKVMKKIFSONYAMLESFSDIDW--GKLP--L-SITMFAQN-PVTDANRNSVVITKLGPKDY-----IQRV---D--SKH-----  
FRFAIKAGPNDN-----AALGIPFMAQLGTFDRA--HKRIGFG--  
>BATEDRAFT\_90625-----SGEPV---TIKY-KGD-  
DYNGVSSDAVVITP-GTRITDINLPLVAVKQSPDLVGINPKL-DGVFGFGHPS-LS--KHH--PPAT-----AMD-VL-YN--HGVIPNNEIGLQLCPYDI-----  
LQESFINIGNTDVTAK-----CG-TDGRSVAVWVDSPP-----DQFTVNIKSILV--NGEKVDL-----PAEFQKRV-EHGRTLYS---SVETCFYMHFRPVVETLVAIDLSGAIATV--IN-----I--FSDK-LGKVMKKIFSONYAMLESFSDIDW--GKLP--L-SITMFAQN-PVTDANRNSVVITKLGPKDY-----IQRV---D--SKH-----  
VVFVAVQAGSNEK-----AALGIPFMAQLGTFDRA--HKRIGFG--  
>BATEDRAFT\_23759-----SGKPV---TIKY-RGK-  
EYNGISSTAVKIS-GTRITGIDLPLVAVKQSPDLVGINPKL-DGVFGFGHPS-LS--KHH--TSVP-----AID-AL-YN--GGVITNNEVGLQLCPYEM-----  
LSDSFINIGNTDITEK-----CG-TDGRSVAVWVDSPP-----DQFTVNIKSILV--NGEKVDL-----PAEFQKRV-EHGRTLYS---SVETCFYMHFRPVVETLVAIDLSGAILVK--KT-----KSEKHK--LSETEIKKIFWENCLMFKSNYNIKW--NKLPS--L-SITMFAQN-PVTDANRNSVVITKLGPKDY-----IQRV---D--SKH-----  
SKHKYLLTVCIRFAIKAGSNDN-----AALGIPFMAQLGTFDRA--HKRIGFG--  
>BATEDRAFT\_22623-----NGQPF---TIKY-KNE-  
EYNGVSSDAVVITP-GTSITDINLPLVAVKQSPDLVGINPKL-DGVFGFGHPS-LS--KHH--PPAT-----AMD-VL-YN--HDVIPNNEIGLQLCPYEM-----  
LQESFINIGNTDVAEK-----CG-TDGRSVAVWVDSPP-----DQFTVNIKSILV--NGEKVDL-----PAEFQKRV-EHGRTLYS---YHCTCFYIRFPKTVVDVLAIDLSGAIATV--IN-----I--FSDK-LGKVMKKIFSONYAMLESFSDIDW--GKLP--L-SITMFAQN-PVTDANRNSVVITKLGPKDY-----IQRV---D--SKH-----  
FLFTVEVGSNDN-----VVLGASFMTLRLGTFDRA--NVRIGFG--  
>BATEDRAFT\_88273-----NGQPV---AIEY-KGE-  
EYRGVSSNADVTIP-GTRITGIDLPLVAVKQSPDLVGINPKL-DGVFGFGHPS-LS--KHH--SPAT-----AMD-IL-YT--NDVIPNNEIGLQLCPYEM-----  
LSDSFINIGNTDITEK-----CG-TDGRSVAVWVDSPP-----DQFTVNIKSILV--NGEKVDL-----PAEFQKRV-EHGRTLYS---SVETCSAIHLPETVVAALINAILDSGAIATV--SI-----L--FKNK-LGKIMVKINLQGNFLISKDFKIDW--DKMPS--L-SITMHAET-PVTDDNRSVVAIKLGPCKY-----IQRV---D--SEDCYKLT-----  
IMFIVTAGSNDY-----AALGIPFMAQLGTFDRA--HKRIGFG--  
>BATEDRAFT\_28777-----YTPSGQPV---TINY-KGK-  
EYRGVSSDAVVITP-GTITDIDLPLVAVKQSPDLVGINPKL-DGVFGFGHPS-LS--KHH--PPT-----AMD-IL-YN--YGVIPNNEIGLQLCPYEM-----  
TSKSFINIGNTDVAEK-----CG-TDGRSVAVWVDSPP-----DQFTVNIKSILV--NGEKVDL-----PAEFQKRV-ENGRALYS---YHCTCFYIRFPKTVVDVLAIDLSGAIATV--SI-----L--FKNK-LGKIMVKINLQGNFLISKDFKIDW--DKMPS--L-SITMHAET-PVTDDNRSVVAIKLGPCKY-----IQRV---D--SEDCYKLT-----  
YLFVAVQAGPNDN-----AVLGSFMTLRLGTFDRA--HKRIGFG--  
>BATEDRAFT\_26088-----SGEPV---TIGY-KGK-  
QYNGVSTTTVTIP-GTSITDINLPLVAVKQSPDLVGINPKL-DGVFGFGHPS-LS--KHH--PQT-----AMD-IL-YN--HDVIPNNEIGLQLCPYEM-----  
TSNFINIGNTDITEK-----CG-TDGRSVAVWVDSPP-----DQFTVNIKSILV--NGEKVDL-----PAEFQKRV-ENGRALYS---YHCTCFYIRFPKTVVDVLAIDLSGAIATV--IN-----I--FSDK-LGKVMKKIFSONYAMLESFSDIDW--GKLP--L-SITMHAET-PVTDDNRSVVAIKLGPCKY-----IQRV---D--SEDCYKLT-----  
FRFAIKAGSNDN-----AALGIPFMAQLGTFDRA--HKRIGFG--  
>BATEDRAFT\_86720-----SGEPF---IIKY-RDK-  
QYKGVSTAAVTIP-GTITDIDLPLVAVKQSPDLVGINPKL-DGVFGFGHPS-LS--KYH--TSVP-----AMD-VL-YN--GNTIPNNEIGLQLCPYEM-----  
ISNSFINIGNTDITEK-----CG-TDGRSVAVWVDSPP-----DQFTVNIKSILV--NGEKVDL-----PAEFQKRV-ENGRALYS---YHCTCFYIRFPKTVVDVLAIDLSGAIATV--IN-----I--FSDK-LGKVMKKIFSONYAMLESFSDIDW--GKLP--L-SITMHAET-PVTDDNRSVVAIKLGPCKY-----IQRV---D--SEDCYKLT-----  
FRFAIKAGSNDN-----AALGIPFMAQLGTFDRA--HKRIGFG--  
>BATEDRAFT\_92592-----QFNSSASSGSGT---QQIEYGDGS-  
KVSQCMYSQVTFVLA-GIQSNQK--FCAAT-SYLPGLNPTI-DGIVGMAPAS-----FQ--EPSN-----IFQ-HL-----  
QAQLPNSQVGFNRSVTTLAAGSAVSRGAGIITFGLNSDLY-----SGSIAWITIP-----DLTRWIVPFKGIIF--GDMNRI-----MDSFLKQV---NLSA-----



IFDTGTTFFVLQVDFPLNSIMGGIDQNTT---GT-----YILDC--RSVSN--LPTLTISFI-----EGVTHTLTWDKQ-----ILIV---Q-----  
NQ-----CISIFTRNNGAVDTGELNRTVTVPP--AIGASFLRHFTYCFDYN--AKRIGLAT--  
>BATDEDRRAFT\_22618-----NGEPV---TIDY-KGN-  
EYRGISSDAVVTIP-GTRITDIKLPVLAVERKQSPDLVIGDPEF-DGIFGFGNSL-LS--NHH--SRIT-----AMD-AL-YN--GGIIPNNEVSLQLCPYEM-----  
TSNSFINIGNTDVTAK-----CG-TDGRSVAVWVDSPP-----DGRHTVNIKSILI--NDKPVNL-----PEEFQKRV-KDGRITLYS---VIQTCFRYIRFPEVVVKALIDAILDSGAIATV-K-  
KA-----M--YSNK--LNSEEIKRIFWEHYAMLESKLNIDW--GKLP--L-SITMFAQN--PVTDDNRNSVVTIKLGRPDY-----IQRY---D--SER-----  
FVFIVAAGSNDN-----VILGIPFMTLRLGLTFDRA--HKRIGFG--  
>BATDEDRRAFT\_28513-----SGEPV---TINY-RGK-  
QYRGVSTAVVTIP-GTRITDIKLPVLAVERKQSPDLVIGDPEF-DGIFGFGYTS-LS--KHH--PQIT-----AMN-TL-YN--DGVISNNEIGIQLCPYDI-----  
LHESFINIGNTDVTAK-----CG-TDGRSVAVWVDSPT-----NDRHTVNIKSILI--NGEVEL-----PAEFQKRV-ENGRITLYS---VIQTCSTFMYPRVVKALIDAILDSNAITVK--  
KT-----V--FSNK--LNKKEVKRIFWEHYAMLESGFNIDW--NKLPS--FTIVMFAQN--PVTDDNRNSVVTIKLGPQDY-----IQRY---D--SEK-----  
FWFTVTAGSNDY-----AALGISFMTLRLAVTFDQL--NKRTGFG--  
>BATDEDRRAFT\_25617-----IDSTTORPVVHPI---VHREYGDGT-  
SVTCTIISDVVSIA-GISIPNQT-----ICAASQVKSIESISL--DGILGLGPPN-----SV--DPAD-----LFS-NL-----ENLSERKVSFYDRVT-  
PINQLQIRDAGEVTFGVPNPARY-----TGNSFWSPIVK-----TDSHWALTSSVVI--DGKTFSS-----TPIVA---  
LMDTGTIIILDKGTFNAINSAMGGVSVQGL-----YELDC--TMVSK--MPSIQFNQ-----GVTLTMTWDDQ-----YFVI---E---  
NQY-----CVSVFGYSANLPPNM-----AIFGAWFLRSFYTSFDYT--GRQIGFAT-  
>BATDEDRRAFT\_27277-----LV---TINY-RDK-  
EYSGSSDSDTAVTIP-GTSITGINLPVIAVERKQSPDVSIGSSNL-DGVFGFYSS-FS--KHH--PPIT-----AMD-IL-YK--DGIIPNNEIGIQLCPYDI-----  
LHESFINIGNTDITAK-----CG-TDGRSVAVWVDSPT-----NDQFTVNIKSILI--NDEQVEL-----PAEFQKRV-EDGHTLYS---FIQTCAYMYLPKTVATLINDLDSGAIATV-K-  
GI-----L--FRNK--LKGIMKSLTQNGYIMPKSEFKIKW--EKLPS--FTIVMFAQN--PVTVNNYSVVTIKLGRPDY-----IQKT---D--SDE-----  
FLFTVTAGPNNN-----AALGISFMTLRLAVTFDQL--NQRIGFG--  
>BATDEDRRAFT\_26741-----SGNPV---SIKY-KGK-  
EYRGVSTAVVTIP-GTRITDISLPVIAVERKQSPDVSIGDPEF-DGMFGFAYPS-LS--KHH--SRIT-----AMD-AL-YS--NDAIPNNEVSLQLCPYEM-----  
LSDSFINIGNTDITPK-----CG-TNGRSVAVWVDSPP-----DGRHTVNIKSILI--NGKQVQL-----PAEFQKRV-KDGRITLYS---VIQTCFFHHPKVVVKALVDAIVGSAITVK--  
KT-----M--FSNK--INSEIDIDEIFWKHYAMIESKYDIDW--SRLPS--LTIKMAFQT--PVTDDNRNSVVTIKLGSQDY-----MQNI---N--SKH-----  
VMFTVVRVGSDDY-----SILGMSFMNRLAVTFDQL--NKRIGFG--  
>BATDEDRRAFT\_24300-----TSNGQPV---TIYY-KGE-  
EYNGVSTAVVTIP-GTSITGANLPVIAVEKQSEDLVGIHPEF-DGVFGFAYSS-FS--KRR--SPAT-----AMD-AL-YK--DGNIPKNEVGLQLCPYGM-----  
LSDSFINIGNTKVTAK-----CG-TDGRSIAWVRSPS-----NDQFTVNIKSILI--NEKPVEL-----PAEFQKRV-KDGRITLYS---VIQTCCLTYMYPRVVDLVAIVDSGAIATV-K-  
KI-----M--LSNK--LNSREIEKIFLKNYAMLESGFIDW--NMPT--LTIITMFAEK--PVTVENSNSVVTIELGPQDY-----MQRY---D--SKN-----  
LVFAVKAGSNDY-----AVLGISFMTLRLAVTFDQL--NARIGFG--  
>BATDEDRRAFT\_25148-----SGNPV---TIKY-KLK-  
EYNGFSSTAVVTIP-GTRITGVNLPVIEIEKQASLVIGDITLQGVFGFYSL-LS--KHH--TSVP-----AID-AL-YN--DGVIPNNEIGIQLCPYDM-----  
LQESFINIGNTDITAK-----CG-TNGRSVAVWVDSPT-----DGYFSVNIKSILV--NGKRVOL-----PAEFQKRV-ENGHALYS---YLHTCLTYMHPKTVATLVAIVGSAITVK--  
KT-----K--LRRK--LYPEEIDDVFLNSLMSQSDYIDW--SKLPS--FTIVMFAET--PVTDDNRNSVVTILGRPDY-----IQKI---N--SED-----  
FVFVAVGVPNDY-----AVLGISFMTLRLAVTFDRA--HKRIGFG--  
>BATDEDRRAFT\_25223-----YNGPTLDYMGQPNAMKISGYSASKA-  
GWTGYGLSLFVGLS-GTDTTADNAPIVNAIRQTANPIFDIGDQDQGLGLAYS-AA--VYK--TNPST-----VMD-AW-VA--AGQFAKNEVAFRACPWEK-----  
ESQSSIDFNTQPVNN-----CG-KNGSPNVWKSPE-----QGLFSVDIKGISV--HGTPVRL-----PSAFQ-----IDRNGR--LS---IIDSCTDLKLPNVNAIRDIMIRLGGFPPL--  
NT-----ARTPAPTR--PINL--ALLPS--ITFHI--ATG--GAMRSAPGTSISVTIGPQY-----LIYR---P--G-----  
YWYQMAAFRSDDSS-----VILGPPFTSLNIVHRT--NHQIGLS--  
>BATDEDRRAFT\_27292-----SSGKPV---TIRY-KSR-  
KYKGFSDTAVTIP-GTRITGINLPVIAVKKQASLVIGGPNQDQGVFGIYSS-LS--DHH--SRVT-----AID-AL-YN--GGVIPNNEIGIQLCPYKM-----  
LSKSSINIGNDVTPK-----CG-TDGRSVAVWVDSPT-----NDQFTVNIKSILV--NGEKVQL-----PKEFQKRV-KDGRITLYS---YLQTCFVYMYPRVVDLVAIVGSAITVK--  
KT-----KSKHKK--L-SKTEIKKIFWENRLILKSLINW--DRMPT--ISITMFAEN--PVTDDNRNSVVTIKLGRPDY-----LQRV---N--SKE-----  
FRFIVEAGPNN-----AALGISFMTLRLAVTFDQL--NKRIGFG--  
>BATDEDRRAFT\_23275-----SSGKPV---TINY-KSS-  
DYNGITSVSVTIP-GTRITGINLPVIAVKKQASLVIGGHPKF-DGVFGLGYTS-LS--KHH--TSVP-----AID-AL-YN--GGVIPNNEVSLQLCPYGM-----  
LSDSFINIGNTDVTAK-----CG-TDGRSVAVWVRSPS-----DDHFTVNIKSILV--DDEVEL-----PEEFQKRV-KDGRITLYS---IIFCTYMYRFPVVDLVAIVDSGAIATV-K-  
KT-----KSEHKK--L-SETEIDEIFLNSLMPKSTYIDW--GRLPS--LTIITMFAEN--PVTDDNRNSVVTIKLGRPDY-----IQRY---D--SKN-----  
FMFTVQAGSDDN-----AALGISFMTLRLAVTFDRA--HKRIGFG--  
>BATDEDRRAFT\_26425-----ESTPSGEPV---TINY-RRK-  
QYKGLTSTAATVIP-GTRITDINLPVIAVEKQSPDVSIGSSKF-DGVFGFHPY-LL--NRH--SRIT-----AMD-VL-YT--NNVIPNNEVSLQLCPYDI-----  
LHESFINIGNTDITAK-----CG-TDGRSVAVWVDSPT-----NDQFTVNIKSILV--NGEVEL-----PDEFQKRV-ENGRITLYS---VIQTCFRYMYFPVVAALVDAIVGSAITVK--  
NT-----L--FRNR--LKGIAVKNLQKNHMPKFEFKIKW--EKLPS--L-SITMFAEN--PITDENHDSVVTIKLGRPDY-----LQRV---D--SDE-----  
FEFIVAAGPNDN-----VILGIPFMTLRLAVTFDRA--HKRIGFG--  
>BATDEDRRAFT\_8959-----SGEPV---TIGY-KGK-  
EYKGVSTAVVTIP-GTRITDISLPVIAVERKQSPDVSIGSSNF-DGVFGFAYSS-LS--KHH--PPAT-----AMD-VL-YT--SDVIPSNEIGIQLCPYEM-----  
ISDSFINIGNTDVTAK-----CG-TNGRSVAVWVDSPT-----DDYFTVNIKSILV--NGKRVEL-----PAGFQKRV-EHGRITLYS---VMETCTYMQFPKVVVAALVDAIVDSNAIAID--  
IF-----N--FYR--LNNLQIENLWKNHLMPEKYFSINW--GKLP--L-SIVMFAET--PVTDDNRNSVVTIRLGRPDY-----IQRY---D--SKN-----  
FVFVAKAGLNDK-----ATLGMFSMRLGLTFDRA--HTRIGFG--  
>BATDEDRRAFT\_90577-----SGQPV---TINY-KGK-  
EYRGISSDAVVTIP-GTITDIDLPLVIAVKKQSPDLVIGGKLGQVFGFYSS-LS--KHH--PPTT-----AMD-IL-YN--YGVIPNNEIGIQLCPYEM-----  
TSKSFINIGNTDVAEK-----CG-TDGRSIAWVNSPT-----NDYFTVNIKSILV--NGKQVQL-----PEEFQKRV-ENGRALYS---YLHTCFYMYRFPQAVVDLINDLNSGAIATV-K-  
NT-----MISKLGKIIKLLQNNHLMKSKYINIDW--VKLP--L-SITMFAET--PVTDDNRNSVVTIKLGPQDY-----LRSY---N--SKD-----  
FLFAVQAGPNDN-----AVLGISFMTLRLAVTFDRA--HKRIGFG--  
>BATDEDRRAFT\_24380-----SGEPV---TIGY-KGK-  
QYKGVSTAVVTIP-GTITDINLPVIAVEKQSPDVSIGSPNL-DGVFGFAYSS-LS--KHH--TSVP-----AMD-VL-YN--KDVIPNTEIGLQCYDM-----  
LHESFINIGNTDITAK-----CG-TDGRSVAVWVDSPT-----YDHTVNIKSILV--NGEVEL-----PAGFQKRV-EHGRITLYS---YLHTCTFMHPRVVAALVDAIVGSAITVK--  
NT-----KSKSRK--LNKKEIKRIFWEHAMPNSFNHIDW--SKLPS--FTIVMFAET--PVTDDNRNSVVTIKLGSQDY-----MQKI---D--SEK-----  
FVFVAVGVSNDY-----AVLGISFMTLRLAVTFDQL--NKRTGFG--  
>BATDEDRRAFT\_27300-----SGRNV---TINY-KGK-  
EYRGIDFATVVTIP-GTSITGILPVVAVKQSPDVSIGSPNF-DGVFGIYPS-LS--KRR--PQTT-----VLD-VL-YN--DGVISNNEIGIQLCPYGM-----  
RSKSFINIGNTDVTAK-----CG-TDGRSVAVWVDSPT-----NDRHTVNIKSILI--DGKQVNL-----PEEFQKRV-KDGRITLYS---YIHTCFYMYRFPVVAALVDAIVGSAITVK--  
KT-----KSEHKK--L-SETEIEKIFWENRLILKSLNIDW--SKLPS--L-SITMFAQN--PVTDENNSVVTIKLGPQDY-----IQRY---N--SKE-----  
FRFTVTAGSNDN-----AALGISFMTLRLAVTFDQL--NARIGFG--  
>BATDEDRRAFT\_26758-----SGEPV---SIKY-KGD-  
EYNGVSTAVVTIP-GTITGINLPVIAVERKQSPDVSIGGTLKQVFGIYHS-FP--NQH--SRVT-----AMD-AL-YN--GGAIPNNEVSLQLCPYDM-----  
LHESFINIGNTDITAK-----CE-TDGRSVAVWVDSPT-----NDQFTVNIKSILV--NGRPAEL-----PDEFQKRV-KDGRITLYS---RVETCFYALFPVVAALVDAIVGSAITVK--  
NT-----LRRKLKDEEIKKLLQANSMPKSNYINW--GKLP--L-SITMFAET--PVTDDNRNSVVTIKLGSQDY-----MWRV---D--SEK-----  
FRFAVKAGSKDH-----AVLGISFMTLRLAVTFDRA--HKRIGFG--  
>SPPG\_01941T0 QYYEITLGTPTQTFVSVL--DTGSSNLWVPTSCSSACWHLHRRFDS-----SKSSTFKPNGTEF---AIQYSGS---LEGISNDVLGVA-  
DLLVKDID--FGESVKEPGETFAYGRF-DGIFGLAYDN-IA--VK--RVVP-----PFY-QM-IQ--QGLLDEPVFGAWFGDQSN-----GGEGEITFGGIDKDH-----  
KGEITWAPVIR-----KGYWEVLQNAL--GGQDYG-----RTKRA-----  
AIDTGTSLCALPVEEADAINTRIGAKKNFNGQ-----YVDC--DKIST--LPALTLKFG-----DKEFTLEGKDY-----  
VLQVSGGPIGGNQ-----CVSGFMGLDIPAPAGPL-----WIVGDVFLRKYTYVDLQ--KNRVGFADA  
>SPPG\_00681T0 -YQGAIEGTTPQPMVSLF--DTGSSQLVWQTTTTGIDINRGRFRDP-----AKSSTFQATSQA-----DPIEYVDGT-SVQGFVKTVAIN-  
TLSPVNLQ--FEAATSIKSPNQNTSDM-DGIMGMSFSLPTT--AGGT-----ASPTW--ERVSAHQVTSPPVFGYI--DSTNQNGGLTLGGVDAARF-----TGGLT-  
WLPVAGSGPNKPEFVWQSLMTAVSPGSSRTLSL--PSNFA--T--VFDGTSLAVLP-VQTADQINSMLNLQVSNM-----PPFLYA-----  
TACGP--GKIPS--GFPDKFEFT--GGHVTISPDQY--LFMQPT--DIAGVTA--CVSGFAGQDIGHGTSSTRPQGAQPLPSAIFGNVFLRAFVTFVDS--NKQIGVAAA  
>SPPG\_07923T0 --ITTIGVGTPAQVMAVQI--DTGSSLFWLRSKCRGTSQGPVYDNTKSTSYL-----PPAPATALTGQR--RSIYVGDNT--KVECLGADTVMLG-  
TLVIPNQT--LCEADVQTTTIGSS--DGLIGLPGGP--AD--TATD--VFR-NM-IA--SKTISKPVASFVWYNSQR--FSDTNAQITFGGMDSSKF-----  
TGSFTWEPPI--TGRNHWSITFEGITL--DSAPLTQ-----NRTGMA--IFDTGTLLAIPSDTLSAIVLAA--NAKQLPNQ--  
SL-----YEIPC--DKVSR--IPPVTHIG-Q-----RRITLFAEQQ-----VFFV---D--GT-----  
CFLIYAASSTNLNVD-----VTLGALFLRHFTYVDFG--ASRTGLA-----  
>SPPG\_08789T0 -YYGPVTIGSQTFQVDL--DTGSSDFWLRGANQSSDGS CGNGQPA-----VSTREFKDTGSQF---QDSYSGS---ADGEIYQTYTLG-

GVTAKNAYFVSTNEQGFDTA-----DGLLGLGFAA-IS---NI--ASAT-----NGRAPIDELGLKSFIFYL---SNANDGQQLVTLTGADSSKY-----  
GGFNYPVLS-----RTYWQYSL-----SGGSVQV-----  
GNTKATFASRINAIDTGTLLIIIGKQKASAIARAAGADSN-----GNISC--SVART--GPKVVFNIN-----GVAYAIPPSVY-----  
VFED--Q--GQ-----CILIGQGGAAQAV-----AIFGDVIRQYITLFDVA--NSRVGFAL--  
>SPPG\_08444T0-----RIDVGTPPRPYVAL--DSSADLWLASPDCKTCVGYEYVA-----SKSTGKVSDDKF---VVAYNEGLRVDVTVTDDLLIFG-  
GFPIKQPP---FAQADKIPK--GFQDVPFDGVLGLAFSA-HS--EQK--APP-----LQ-SL-VD--QKVIKSFALHIPAGK--QATMTIGGIDPTKF-  
SGEIDFVVDN-----AAGQWLNLDIQA--QKGAVDY-----GTKKG---LIDTGSVLLGPMEDVRKVFVAAIPGSAEMANG--  
T-----FTVPC-----NQDNFALKLGGKDYGLNGVDLDEFVSAVGN--NAN-----  
CVAALSGDQIKS-----WVIGTFLKQFYTVWDL--VPRFGLAK--  
>SPPG\_04035T0-----IDVGTTPQSFKAIV--DTGSYDAFLKAKECLDTGCVCKDITYDGS-----KSSTFTTTGSPV---TLAYADGT-AVTGVAARDTTTVG-  
GVTMSNFTFLRVLRYKQASTNVTY---TAMLMGMPS-----SN--ATAGTPGRLSGSSLGRSV---TGQLSDAGIKPIFGLYPT-----LDGKPLLTLGGIDTTKF-  
SGDLTWDVPT-----FANSSAIDPVMAAGTAGMKAVMGAVKYPDGTENQV---AGLPI---LIDTGSLLFPQSFVTLGQSIGGTLQAQ-----  
ASGLQI-----YKVSC--DKIKT--LQDLTLTG-----GKTVSIPPSY-----IQNSFIRG---ETG-----CVLGFVSLGTEGALGGA-----  
ALMGNMLRAFYTAWNNG--DRQVGFAR--  
>SPPG\_02558T0 AYFGQVKGTPAQFTTAMF--DTGSYQFVWRSKLCTVQACQGHPKYD-----DLSSSYVSTNTKA--DLITYADGT-KVQGVYAKEKVSVG-  
SVAQGLTFEEVTDNLSLGAAY-----DSIMGMWCP--VD-----KPKS-----WFQ-TL-VQ--NGGVTSPVMGWVIDSTNT-----DGSITLGGVDSARF-  
TGLTQWVPSFG--FASNGGGGPFYIQQGLTV--AGSVTM-----GNITPPLSWSQGHFLS-----  
VFDGTSMVSPVTKVAADIIHAQFPAFIDPSRPGK-----DTGLWPPSPPHK-----YYTGW--CDLNT--LGNVTLVSVF-----GEEGLVSLTLEPHEW-----  
VLYIPKNNQPNY-----CLSFVGNDAVAQKVTVNGLIA---GILGNSLLRKFYTVFDWG--KNRTGFAL--  
>SPPG\_00268T0 -YYTSLVGTGPKWFSVVI-----DTGLWPPSPPHK-----EETGTQRNQGLT---SLAF-RSL-PILGASASGVV---  
DYVRIGLINTSQVFIQADQMNVPANVDGLLGLSFS--LS--WAN--SVVDPNLVKGSSIE--NL--YY--GRKQQPAFQVWLDKYSV--WSAAPGSTVGGELALGSGTGNPA-----  
RYTGPITWLSVFN-----TANWHVQLNGIA--GPDGYNL-----VPSGRAIRG---LIDTGTLLIVVDYVAARL--NGLLGAAGVGR--  
GL-----WAVSC--NKAKNSGVKITFTLQ-----NKFTLDAADL-----PTRVMPD--PNT-----  
CYAPFQARQNDVTDK-----WILGEVFLRKYIYDYN--VQS-----  
>SPPG\_05983T0 -FIQGEIGTTPQKLTVRF--DTATQLSWKKAAYKEPKKYDDYNSYDKYDEYKNDYPERELVYFGDPDKSSTWQDGGREG---DLEY-YGQEKVIVKEGRDVMNVG-  
GIEAT-----VTFGLRQNEVSEANETV-DGHFGLSLRN-----PDL-----FDPWL--YQAVKDGVCDFALDPPVPEPKAYAPQTPSYGKRQDSYDYEPKPKPPTAQLSICG-  
YEGQMPTRFNHVT---QRGLQYGYWQLNKKIKV--GQSLVPLKESREDPYGYQSYE--PKQEKIDA---LIDTGSFIMLPKIAVDK--IHLLGAYGAGVR--  
YGYSEYKDDYKDDYKDKYKESHSRRATSMMANSTSGFW--RSQTG--IKSHDLCTV-PCASVPKLANITLTFDQGDY-----PILPAEY-----  
IQKDPDDY-----GKQCYSVFTTFK-----  
>Hp\_gm\_asm116-0.104 QYGEITLGTPTQTFVVF--DTGSSNLWLPSTCRSSIAICLHRRYDA-----SKSSSYVANGTEF---AIQYGTGS--  
LEGVISEDLSLSDSLTIVGQN---FGESVEPIGTAVGRF-DGIFGLDYDT-IA---VQRVPPFY-----QM-VN---KQLLDEPLFGVWLGSDAS-----  
GSEGGEGEISFGAVNHDFH---KGPITWAPVVR-----KAYWEALQSVTL--GGKPLAI-----KSSSA-----  
AIDTGSLLFALPTAEADAINKAIGGKGNWQ-----YTIDC--AKLDS--LPDLGLQFG-----NKTFTLTGNDY-----  
VLKVSQPIGGGEQ---CVSGFVLEIPAPIGI-----WIVGDVFLRKFYITDIA--RNRVAI---  
>Hp\_gm\_asm242-0.207-----TAVNTNVN---PTISYDGT-  
TVDCTVYDLSLTFG-DL SVTKQK---VCVATRFATSASRTMN-AGILGLGNTL--N--DPA--NVAD-----GVS-SI-----LSSFTDKIVSFYDRNVV-  
VNLGTEETKNAGEVTFGPNARSF-----KGLSWAPINK-----IADFWTLPIITGASV--GSYSYI-----TRTSYV-----  
VMDTGSLLITIDQPVADGINLALGFTYAGSGL-----YTIDC--TKLKS--SLPTITITLG-----GLTFNFGAAA-----IAVVDPTT---  
NT-----CISGVTAPTSANSP-----RIFGVAFRLNLFVAFDYSS--GGRIGFAP-----  
>Hp\_gm\_asm117-0.23-----  
TLSPE-----DGLIGLPPQ-SV--SS--EPAD-----LFA-NL-----  
RSSFNQSKISFFYNRAVNSIDGSEVVPNAGEITFGDNPAPF-----TGSFTWIPINP-----SDPHWAVTIDSITV--NGQSMF-----GQTA-----  
LMDGTTLYIITNPMFATINAQM---NGIATN--GM-----YQVOC--TKRVS--FPITFSMG-G-----ASFTLTDWQK-----VVVL---Q---  
NRF-----CVSVFSEALDGLP-----SILGVSFLRHFYTSDFSG--QGRIGIAA-----  
>Hp\_gm\_ctg07303-0.1-----  
-----VNSTE-DGIIGLPPG-GV-----STAD-----VFK-NL-----KTAFTESKISFYHDKRVE--DAGGVFAAGGGEITFGVNPNNRY-----  
TGSFTWFPIDP-----TNQHSWTAMLSVSI--GGASVDV-----GSI-----LIDTGAATNLDANTV-AFINQLGATQVAGQ--  
RF-----PQVPC--DKVSS--LPPVVKFG-P---TPNTAVSFASWSF-----IVYNPAD---KN-----  
CYSTLNAPGPASNK-----TVIGAVMRHFYTSYDYD--NRMIGFA--  
>Hp\_gm\_ctg01303-0.7-----ATVQLGSQOTSLDVL--DTSSTLFWHSPLTLN-----TRLFPF-----ILPWWMLSDTNNSPQISRLPLSSNGKITGFRN---QSIYPDGS-  
VWACSVTYDLSLTVG-SVQISSQG---ICVADSYTSLGGNAPYD--GVMGIGNL--A--DPT--NHAN-----APA-SI-----LNGFVDDKVSFFYNRQST-  
SSISNETSNAGEITFGTNAARY-----TGSINWPIAQ---TGTPAWGLSITVTA--GAFSATA-----KAGAAI-----  
VVDTGYPYFALDITVAQI-----  
-----NKALGFS--  
>Hp\_gm\_ctg03169-0.2-----  
RIDCSLYKDSVTLG-----DVTLPAAITCVTNSYNQTTNPR--QSVLGITPNI---TAHPADPAD-----LTA-QI-----LAGYTSKVSFFNRSRM-  
TVLDTNIVDQAGEVTFGAPNARY-----TGTGLSSVILPS-----STVSQWLFNSITA--GNTSFQF-----NGTVKPI-----  
SFQSTTFIYLDTNVADISINAAIGFTRASNGD-----NVVDC--AKLKTTFPKLYMSVG-----TVLYTIGILNV-----VNVF---Q---  
GN-----CISGIYITGEN-----VLGSVFTRSFYTFDYD--TNSITTAQ-----  
>Hp\_gm\_ctg07229-0.0-----NVLF--DTGSNVFVSSSSCA-----GCTKA-----Y-----NTTASASIKSTSI--LSFGYDGT-  
QVNCVFTDITLS-GVTLPGQN---VCVASSLDPV-NSP-E-DGIIGLPPQ--P--NP--SQAD-----VFA-NL-----KTSFAESKISFYHNRQVE--  
DTSGDPAPNSGEITFGVPNATRY-----VGNFF-----  
W-----  
>Hp\_gm\_ctg13909-0.3-----  
QWIGFSGFSDQVLA-NTTIVATNAPTIGAIQNGPPIPTGPPDSEGLFGVAYS-LSMYGN-KNPGT-----VVD-AW-YQ--SGTMAKNQFLFHGCPYDK-----  
QSQSFDFGYTQPVYTI-----CGNTAGTPYVWAKSPQ-----LAWYTLDIRAILV--NGVAATL-----TSAFQN--PTGSMRWS---  
IIDSCTSLVMLPPAAFNALTAI-----  
KN-----  
>Hp\_gm\_asm117-0.25-----LGTIQVGTTPVPLNVLF--DTGSDIFWINSVQCSGGNGCLDNSTAYDL-----TKSSSAVPLSKSI---PPVYGDNT-  
TIQCSLFTKEVTVG-GITLVSQO---VCVATQVFNPLNTNE--DGIIGLGVPS-----SGVT-----LA-NL--FASLKLRLPANMASFWYNNRNL--  
SSTDLIEHGEIAGLRPDSRY-----IGFAWL PVL P-----KQAHWTVAMMISV--DDHAMT-----TGSTA-----  
IIDTGSITILDGTLASEINTRLGGWPASTTS-----DVF-----YLFDC--ATVQS--LRSVFTLA-----NFNFTLTDWKL-----FYTTTLNG---  
KTF-----CISTLWKSMPGF-----NILGCTFLKHFYTAFDQF--NLRVGFAT--  
>Hp\_gm\_ctg09870-0.5-----APIQLGSQKSHIDVIL--DTGSNVFVWSVAGCN-----GCISPQ-----YDT-----KKSSTAKTSGNHN---AVLKYGDNT-  
VVECAFNNDTLALG-DITVSTEG---VCVATKYTPGSEVAHDF-TGILGIGSSL--E--KST--NLAN-----APA-SI-----LAGFSEKISFYDRSVL-  
VNLARNQTKGAGEVTFGPDSTRF-----TGDIIHWSKITK-----ANSFWEVPITSVEV--GTFKHITY-----DSAQTI-----  
ILDSGTSIYLDQDVAADVANTLGFASAGDF-----YTIDC--SKLAS--NNSRTSFSIG-----SVKATLSTIAL-----TVVV---E---  
GS-----CFAIVANPPNSL-----RVLGAGFLRNFYTSFDYD--TASVGA--  
>Hp\_gm\_ctg01127-0.11-----GTLISIGTPAQNLNVQF--DTGSSYLWVSGPQCDTGTCAQSKKFPN-----SASSSFGPAPDPAVASHTYGGDST-  
QVACTVGIIDTINLA-GVPPANAT---VCVANDVSGSAGV-----DGMIGLGPV-----GQ--ADTS-----IVA-WI-----KSSFAQPYMSFWYNRAGP-  
ANGPNAGEITFGGINPARV-----NTQKPAWLPPL--MTQDTSAWTVSLSAAAV--GSQVAT-----QGTQA-----IIDSGLTILPRAVFNGL--NAVQATLDPNL--  
GV-----YTFDC--GKVAT--LPPISFTA-GSPHF-----YVLSAQGIY-----YASG-----ST-----  
CAWGLTPTDITL-----AIFGVVFMRFQYVTFDFTG-PMQIGLS-----  
>Hp\_gm\_ctg01127-0.10 ---GYVSIPTPQEFVQVQF--DTGTSVSWRSTACRNSGCLPGDISFN-----PTASSTYKAGNST--QSIYDGT-  
RVNCRIVHDVIAVA-GVQLKSNN---ICIATEIITPGSSSL--DGLFGLAPPK-----QEATLQSDQEED-----  
AIAGEITFGGRNPSRF-----VNDTIIWLPVV-----NATFVWVAFNSMQY--GNVTLQI-----TDAMRHA-----  
IIDTGTLLNLPAAFIDVNNKMMGKLNQYGL-----YELDC--RKVTS--LPNVTFSLA-----GHDFLTYQDL-----VLTD-----  
SET-----CVSIFGRTPDTF-----TVFVSVFLKYYITFDLA--GSGVFAQ--  
>Hp\_gm\_ctg03150-0.14 ---TSISIGTTPQSLYVVP--DTGSWMLWIKSSQCT-----QCA--PPVYNG-----KQSTYRSQGQIA---SPIQYDGT-  
SILGFYCSDDVTIG-SLMPNFV---FTEASYV---NRTRSTL-HGVLGLSFP-----SS--QPID-----HFFTRLNQT--SDPASAPVFGYIEQNGQ--  
YGLWTVGADIGRY-----SGDLTWYPVVS-----NQWLLQTTAFFV--GDTQLTS-----IPNMRM-----  
MFDGTGSLTMFPLNVAKALNEAMLLPILPATDPNN-----LPQ-----YGMPCFDGVIPK-NLPNITFSFQ-----GASQGITPREY-----MYIG---  
SISGNLY-----CFSTIIGNGDGL-----AIFGNALLRRFYTVFDVQ--NAKIGVAV--  
>Hp\_gm\_ctg01303-0.6 ---GTLVGSQKALDVLV--DTGSTVLWISSAICT-----GCLVTT-----YDP-----RASSTAKQTLPP--KTINYADKT-  
AVTCSYVTDISGL-DLSPVSSG---VCVATMFATSDDRQRN-PGIMGVGWDL--A--DPN--NPAN-----GPA-AL-----LAGFSDKVSFYDRSVV--  
VLSGTEFPNAGEVWGPAPNSRY-----NGSISYPIIK--TAGSIFSNYMLPITSLSC--GSYVASL-----SSSAV-----VMDTGTAMAI--DSTVAANINTAFG---

FTLS--SN-----GDYVIDC--SKLTS---GTFPQL-KVTLGG---ITFTLGIGNI-----VIVY---N---GV-----  
CTSGIVGGPVDT-----PLFGVVFLRNHFVTFDSA--GGQIGFA--  
>Hp\_gm\_asm375-0.190 ---GSVQLGSQKAALDVVL--DTGSTVFWVSSGICD-----GCTFTQ-----YNP-----NQSATAHSTGIQN--PTMVYGDGT-  
TVDCFTFFDVSVVFVGDITLPSEG--ICVATKFFAAGLKNLG--GIMGIGKIL--N--DDN--NRAN-----APP-AL-----LASASEKKVSFYDRSIE-  
IALSGDVRDNVGEVWAPNARY-----TGQINWTPIMP-----TNNYFWTLPLKSITI--GSFSRTF-----NDQPI-----  
IMDSGTSLLLLTDSALVDSINSALGYTVGSGQ-----FATIPC--SRI---WDGTVFVKM-----QITLGNVNF-----  
QLSIANTMIVLGN-----CASGIIKGGD-----NIFGVFLRNFMTSFDYT--AGAVGFAQ-  
>Hp\_gm\_ctg01383-0.6 -----TAFQY--  
GDTLLEGTIVSDTVGLADQQSFTSQNIGQCVAS-----FMNSDF-DGIFGLGPG-SS---LN--GLST-----PLQ-DL-AN--QGLLPANIFGLFLATGDS-----  
TASALTLGGTDPST-----SADINWVPLT-----GSQRWQVTLDSLAV--LPPSSV--FSQLLNTSSQPTVIASG--MQA---VFDTGTSLIAMP-VQYADAIHALLAPSVLFNN--  
RL-----RLIPC--MNPS--ISIKLNG-----IEFILTADY-----IIPF---G---FGY-----  
CVSAFVGLNIENV-----IVLGDFTLRKYYSVFDVD--GARVGLV--
